# Supplementary material for: Stat3 and c-Myc Genome-Wide Promoter Occupancy in Embryonic Stem Cells
Source: PLoS One. 2008 Dec 11;3(12):e3932. doi: 10.1371/journal.pone.0003932 (PMC2592696; doi:10.1371/journal.pone.0003932)
Supplement: Table S1 — Stat3 bound regions in murine ES cells (0.11 MB XLS) [file pone.0003932.s001.xls]

## Sheet: 1peak_3tiles_all
Table S1. Stat3 bound regions in murine ES cells
Refseq	chromosome	start	end	non-redundant
NM_172606	chr15	31400484	31400733	1
NM_213614	chr16	18536586	18536831	1
NM_183249	chr11	83563199	83563308	1
NM_134054	chr12	55540765	55540976	1
NM_028632	chr12	85858351	85858677	1
NM_178066	chr10	128204995	128205098	1
NM_026169	chr19	5846215	5847585	1
NM_025817	chr6	53749164	53749274	1
NM_028788	chr4	45915521	45915673	1
NM_026185	chr11	77334603	77334782	1
NM_026501	chr11	100913569	100913782	1
NM_024172	chr7	4287355	4287696	1
NM_001008547	chr5	146475584	146475730	1
NM_198000	chr2	30622842	30622952	1
NM_198637	chr11	75816555	75816658	1
NM_144953	chr1	52897110	52897297	1
NM_172615	chr16	32787873	32787997	1
NM_030141	chr17	56561294	56561865	1
NM_026627	chr2	17913712	17913938	1
NM_026977	chr1	75020018	75020241	1
NM_024461	chr3	122917947	122918298	1
NM_023712	chr7	126162703	126163053	1
NM_146068	chr16	16060037	16060256	1
NM_025509	chr3	130699021	130699236	1
NM_021329	chr11	68806964	68807139	1
NM_025880	chr7	44125556	44125784	1
NM_028596	chr5	110687190	110687480	1
NM_026455	chr8	75151082	75151194	1
NM_028244	chr17	31764637	31764744	1
NM_001007589	chr4	34578152	34578291	1
NM_176835	chr15	98923352	98923645	1
NM_144518	chr16	14043600	14043795	1
NM_029389	chr14	33088221	33088939	1
NM_001032413	chr3	87852189	87852369	1
NM_028469	chr5	139630921	139631167	1
NM_028883	chr8	122662573	122662681	1
NM_029849	chr7	4639475	4639612	1
NM_172753	chr8	71662388	71662494	1
NM_198654	chr1	192769323	192769471	1
NM_183131	chr7	126612424	126612684	1
NM_024273	chr16	38433009	38433332	1
NM_026290	chr17	28246835	28247148	1
NM_181815	chr12	91789387	91789749	1
NM_030189	chr4	134769928	134770206	1
NM_028737	chr7	43372523	43372652	1
NM_172741	chr7	33959230	33959441	1
NM_027640	chr8	98461192	98461409	1
NM_024203	chr17	15100354	15100460	1
NM_029013	chr6	88596087	88596356	1
NM_001004146	chr11	3029878	3030051	1
NM_028666	chr2	151665067	151665284	1
NM_175392	chr2	30185701	30186006	1
NM_175261	chr6	52107134	52107248	1
NM_001039586	chr9	105926538	105926647	1
NM_026377	chr19	47780706	47780856	1
NM_177013	chr6	24904594	24904877	1
NM_176952	chr8	37846147	37846322	1
NM_175521	chr5	137969723	137969869	1
NM_207266	chr2	74554322	74554434	1
NM_172396	chr8	75498447	75498633	1
NM_001034895	chr10	80646499	80646851	1
NM_177194	chr7	134067584	134067823	1
NM_001024621	chr14	51663007	51663215	1
NM_176992	chr3	121636153	121636262	1
NM_212473	chr7	132627125	132627232	1
NM_174850	chr5	139989671	139989977	1
NM_030210	chr5	126141561	126141704	1
NM_198608	chr17	44969100	44969208	1
NM_178259	chr11	10139820	10140066	1
NM_013851	chr11	109810916	109811344	1
NM_178688	chr19	57251473	57251650	1
NM_183000	chr5	23924071	23924211	1
NM_015729	chr11	115985425	115985714	1
NM_007394	chr2	58379631	58379927	1
NM_052977	chr13	8202847	8202992	1
NM_172875	chr4	128463926	128464141	1
NM_197985	chr6	119384119	119384406	1
NM_009627	chr7	110418631	110418953	1
NM_182928	chr15	89148339	89148449	1
NM_001008533	chr1	136051430	136051613	1
NM_007420	chr18	62304610	62304866	1
NM_178928	chr18	61855425	61855571	1
NM_153577	chr7	30025382	30025597	1
NM_145505	chr19	57410326	57410615	1
NM_172714	chr5	100730676	100730783	1
NM_001008422	chr7	44881015	44881301	1
NM_178909	chr11	17112402	17112644	1
NM_001033042	chr13	74847434	74847571	1
NM_183167	chr7	41106468	41106818	1
NM_019774	chr17	32051865	32052090	1
NM_007433	chr1	88930485	88930699	1
NM_026316	chr19	3926339	3926629	1
NM_024178	chr3	121357146	121357255	1
NM_007440	chr11	70076944	70077212	1
NM_027480	chr10	81046166	81046527	1
NM_130889	chr4	46468106	46468312	1
NM_009686	chr5	66899172	66899354	1
NM_009694	chr17	47904137	47904263	1
NM_030255	chr15	79720158	79720421	1
NM_013475	chr11	108233653	108233862	1
NM_146161	chr5	103006549	103006660	1
NM_023598	chr10	67537034	67537958	1
NM_019927	chr9	59283176	59283554	1
NM_177305	chr1	90531312	90531454	1
NM_022989	chr2	53220328	53220500	1
NM_001034858	chr10	41711715	41711825	1
NM_019915	chr7	101452615	101452796	1
NM_026855	chr8	127639229	127639410	1
NM_011791	chr8	27304460	27304752	1
NM_025610	chr19	9186037	9186252	1
NM_001039939	chr2	153036639	153036829	1
NM_007498	chr1	192877091	192877191	1
NM_025770	chr13	91687394	91687785	1
NM_153778	chr6	72162305	72162478	1
NM_015804	chr8	12874255	12874362	1
NM_009723	chr6	113946988	113947098	1
NM_026468	chr15	102500784	102501064	1
NM_029121	chr17	86852173	86852420	1
NM_144930	chr8	96168652	96168803	1
NM_029007	chr12	14176607	14176925	1
NM_134154	chr19	5878834	5879081	1
NM_001024602	chr12	113168475	113168818	1
NM_009465	chr7	25495350	25495499	1
NM_029792	chr9	26504173	26504456	1
NM_145222	chr1	88131131	88131351	1
NM_177072	chr16	23120570	23120685	1
NM_011792	chr9	45586847	45587121	1
NM_009736	chr4	41136073	41136324	1
NM_007526	chr13	48670742	48670934	1
NM_001001182	chr2	59932653	59932829	1
NM_144885	chr2	30806007	30806116	1
NM_178577	chr9	21670626	21670803	1
NM_001040201	chr18	60560110	60560264	1
NM_198967	chr6	148311583	148311690	1
NM_145635	chr2	158188053	158188201	1
NM_198603	chr6	115805829	115806046	1
NM_029815	chr2	170048309	170048482	1
NM_009747	chr12	105961996	105962177	1
NM_024469	chr6	145822312	145822541	1
NM_021560	chr3	18247634	18247906	1
NM_010800	chr5	144439154	144439259	1
NM_007544	chr6	120872571	120872790	1
NM_177772	chr10	85440936	85441226	1
NM_001025387	chr17	33728199	33728394	1
NM_021555	chr15	76195383	76195531	1
NM_029426	chr7	141758467	141758685	1
NM_145125	chr16	96185166	96185283	1
NM_007567	chr9	108047362	108047611	1
NM_026495	chr2	25943398	25943585	1
NM_025788	chr8	87556984	87557136	1
NM_177842	chr2	33466108	33466957	1
NM_177233	chr6	97025791	97025894	1
NM_001002781	chr2	21047205	21047351	1
NM_177731	chr4	101401162	101401374	1
NM_181344	chr6	124458406	124458813	1
NM_177916	chrX	57445927	57446218	1
NM_146016	chr11	29664155	29664302	1
NM_194340	chr5	33151551	33151801	1
NM_153082	chr12	4042273	4042378	1
NM_145855	chr10	77227217	77227509	1
NM_145413	chr1	158544215	158544436	1
NM_022021	chr18	11768342	11768451	1
NM_145851	chr2	180196029	180196274	1
NM_019582	chrX	6765269	6765447	1
NM_009785	chr14	28547644	28547888	1
NM_153163	chr6	23198047	23198260	1
NM_028296	chr11	92916718	92916942	1
NM_007592	chr4	8117119	8117299	1
NM_172553	chr10	102457180	102457588	1
NM_019626	chr8	90360530	90360715	1
NM_007625	chr11	118900771	118901194	1
NM_029586	chr11	108504104	108504243	1
NM_026459	chr8	23437588	23437742	1
NM_026439	chr16	45015356	45015553	1
NM_011337	chr11	83463084	83463327	1
NM_017367	chr5	94269122	94269271	1
NM_026772	chr19	5921760	5921984	1
NM_026373	chr19	4098466	4098735	1
NM_009874	chr13	101831246	101831461	1
NM_007671	chr4	109162267	109162557	1
NM_028236	chr7	43500422	43500531	1
NM_011927	chr7	15851971	15852150	1
NM_172133	chr11	79995206	79995320	1
NM_001033263	chr10	126492462	126492637	1
NM_013459	chr10	79293960	79294069	1
NM_001025566	chr19	3846674	3847032	1
NM_133709	chr7	99882640	99883025	1
NM_011930	chr17	24899793	24900482	1
NM_017393	chr17	56678801	56679013	1
NM_133978	chr9	114627539	114627835	1
NM_033570	chr1	36412240	36412398	1
NM_009923	chr11	100387475	100387871	1
NM_016706	chr11	88788731	88789082	1
NM_007730	chr9	79503172	79503346	1
NM_025685	chr4	62699621	62699799	1
NM_007734	chr1	82467559	82467743	1
NM_199473	chr4	125790206	125790450	1
NM_017477	chr6	87875868	87876319	1
NM_009940	chr7	118323520	118323689	1
NM_178893	chr4	46567327	46567631	1
NM_009943	chr7	127996746	127996885	1
NM_009945	chr9	79545003	79545292	1
NM_025350	chr6	30591650	30591758	1
NM_030703	chr19	43993188	43993347	1
NM_027904	chr16	30118560	30118787	1
NM_153166	chr17	28969820	28970048	1
NM_027485	chr8	75474558	75474673	1
NM_145473	chr15	81763894	81764000	1
NM_009973	chr5	88898817	88899319	1
NM_007792	chr10	110320470	110320623	1
NM_030137	chr2	30417466	30417905	1
NM_022325	chr2	174082121	174082225	1
NM_024192	chr19	46392658	46392807	1
NM_007804	chr5	122306079	122306185	1
NM_029787	chr15	82999339	82999478	1
NM_009994	chr17	79624841	79625002	1
NM_010007	chr4	96155123	96155292	1
NM_020010	chr5	4110141	4110286	1
NM_001033483	chr15	96018495	96018822	1
NM_145959	chr15	58446615	58446726	1
NM_001002769	chr5	143142076	143142283	1
NM_023665	chr4	134192578	134192888	1
NM_001033415	chr5	67888086	67888227	1
NM_029884	chr8	27411759	27411979	1
NM_181854	chr8	13868899	13869182	1
NM_001007571	chr8	87132615	87132757	1
NM_172911	chr8	37492727	37492931	1
NM_001001602	chr2	35484588	35484767	1
NM_029974	chr3	89445889	89446066	1
NM_001008232	chr4	135517857	135517962	1
NM_001042719	chr14	44579367	44579674	1
NM_178052	chr1	138232492	138233115	1
NM_145157	chr2	152271243	152271583	1
NM_177857	chr3	103257109	103257310	1
NM_178683	chr13	109436271	109436388	1
NM_183286	chr11	77848040	77848142	1
NM_011303	chr4	144160702	144160844	1
NM_017398	chrX	125091136	125091462	1
NM_177852	chr2	180637861	180638016	1
NM_172910	chr8	14097399	14097511	1
NM_007862	chr16	31639206	31639346	1
NM_007866	chr7	28005281	28005390	1
NM_010056	chr6	6810340	6810487	1
NM_145831	chr19	25738842	25738950	1
NM_172704	chr4	150701547	150701729	1
NM_029669	chr18	35832890	35833131	1
NM_058212	chr12	84380883	84381161	1
NM_010075	chr5	27235471	27235806	1
NM_145395	chr2	122004454	122004602	1
NM_025869	chr8	32559732	32560051	1
NM_027727	chr18	75142880	75143054	1
NM_029166	chr10	89173361	89173821	1
NM_174999	chr10	93733225	93733462	1
NM_026530	chr17	55601172	55601588	1
NM_001005477	chr5	106697840	106698264	1
NM_177057	chr6	87664715	87664923	1
NM_177571	chr4	143108092	143108221	1
NM_007897	chr11	44463019	44463344	1
NM_010095	chr14	66189971	66190215	1
NM_021306	chr1	88986326	88986687	1
NM_001001932	chr10	95369414	95369668	1
NM_026007	chr19	9033568	9033784	1
NM_001039039	chr7	97219683	97219804	1
NM_010118	chr10	66935052	66935231	1
NM_010119	chr19	6302747	6303041	1
NM_010120	chr18	46723150	46723862	1
NM_145139	chr15	78897431	78897574	1
NM_023743	chr11	3093698	3094133	1
NM_080287	chr2	165015213	165015321	1
NM_170777	chr9	21863847	21863957	1
NM_010330	chr13	118170906	118171048	1
NM_010131	chr6	85154336	85154907	1
NM_010132	chr19	59513217	59514071	1
NM_017468	chr5	89557144	89557382	1
NM_007930	chr13	98595948	98596127	1
NM_010136	chr9	118326069	118326365	1
NM_183428	chr4	131350639	131350745	1
NM_053087	chr5	92098163	92098270	1
NM_010141	chr4	28983233	28983404	1
NM_010145	chr1	182853258	182853548	1
NM_144848	chr15	75945653	75945761	1
NM_025516	chr2	155701866	155702001	1
NM_133753	chr4	149691724	149692058	1
NM_001014976	chr15	102120879	102121058	1
NM_019578	chr4	133646399	133646578	1
NM_017399	chr6	71129574	71129873	1
NM_007985	chr13	63439766	63439875	1
NM_177244	chr2	69512254	69512369	1
NM_172571	chr11	115970785	115970999	1
NM_010181	chr18	58334041	58334323	1
NM_001033312	chr5	143153738	143153841	1
NM_015798	chr18	85068288	85068805	1
NM_001037713	chr11	72133519	72133669	1
NM_153195	chr10	85449429	85449678	1
NM_134469	chr3	89182179	89182398	1
NM_007996	chr9	51682924	51683099	1
NM_153111	chr1	74816136	74816860	1
NM_080433	chr14	11137261	11137571	1
NM_010196	chr3	83117175	83117440	1
NM_010199	chr16	28360700	28360805	1
NM_010206	chr8	26890460	26890684	1
NM_012013	chr6	85992538	85992679	1
NM_010223	chr8	73454138	73454278	1
NM_008027	chr17	35433772	35433874	1
NM_010234	chr12	86362527	86363053	1
NM_008037	chr5	32410447	32410628	1
NM_010446	chr2	147739166	147739543	1
NM_008023	chr19	16938365	16938617	1
NM_013519	chr8	124004377	124004785	1
NM_008242	chr13	99456280	99456499	1
NM_008593	chr4	114321117	114321525	1
NM_008022	chr19	24966275	24966416	1
NM_010426	chr8	123968276	123968664	1
NM_008024	chr8	124013304	124013410	1
NM_012020	chr9	98763838	98763942	1
NM_175473	chr5	96615296	96615516	1
NM_177603	chr19	41899724	41900016	1
NM_177863	chr4	82489838	82489948	1
NM_144939	chr17	47156620	47156732	1
NM_011356	chr2	80246371	80246477	1
NM_010242	chr9	14496474	14496620	1
NM_027534	chr1	108585049	108585162	1
NM_008059	chr1	194970436	194970701	1
NM_053252	chr19	5724076	5724233	1
NM_133837	chr2	5756567	5756999	1
NM_010248	chr7	96953897	96954144	1
NM_010250	chr11	42025012	42025184	1
NM_008077	chr2	70362361	70362511	1
NM_144731	chr8	60481868	60481982	1
NM_030228	chr11	4960468	4960574	1
NM_008088	chr11	67351526	67351638	1
NM_018855	chr8	126405870	126405976	1
NM_008090	chr6	88164930	88165274	1
NM_008091	chr2	9801070	9801287	1
NM_010258	chr18	11051503	11051664	1
NM_015739	chr5	24034865	24035207	1
NM_144909	chr5	31576294	31576441	1
NM_145741	chr14	32747331	32747515	1
NM_010275	chr15	7795800	7796015	1
NM_020014	chr2	130731926	130732056	1
NM_010285	chr2	157033992	157034169	1
NM_148951	chr10	80746743	80746846	1
NM_009752	chr9	114247625	114247884	1
NM_175459	chr19	28744838	28745215	1
NM_025374	chr17	30337033	30337134	1
NM_010297	chrX	132112780	132112901	1
NM_001001650	chr3	86090606	86090815	1
NM_001033288	chr1	15877773	15877918	1
NM_001033296	chr2	139982562	139982666	1
NM_198621	chr5	25027723	25027930	1
NM_001033356	chr7	45550498	45550743	1
NM_001042715	chr8	97942330	97942541	1
NM_001033434	chr11	103422275	103422551	1
NM_019690	chr2	173925602	173925709	1
NM_010312	chr5	137761650	137761838	1
NM_010313	chr9	75098860	75099067	1
NM_029364	chr10	120787527	120787634	1
NM_025673	chr15	12521506	12521611	1
NM_022320	chr1	94812002	94812148	1
NM_001039195	chr3	80888611	80888897	1
NM_175481	chr9	42693035	42693145	1
NM_008174	chr6	28212438	28212552	1
NM_133256	chr5	75356851	75357067	1
NM_026231	chr3	133027368	133027545	1
NM_008184	chr3	108077062	108077204	1
NM_001039519	chr9	69811155	69811696	1
NM_133801	chr17	56690380	56690525	1
NM_001033194	chr1	54611931	54612137	1
NM_145147	chr5	110344970	110345083	1
NM_001048207	chr18	32700496	32700605	1
NM_027304	chr15	98056932	98057232	1
NM_178878	chr5	30429286	30429430	1
NM_010402	chr8	60222325	60222438	1
NM_008216	chr15	56286459	56286874	1
NM_080446	chr10	119515411	119515592	1
NM_198298	chr11	107486264	107486449	1
NM_022331	chr8	97322110	97322353	1
NM_172746	chr7	126659025	126659129	1
NM_010657	chr4	119593758	119594331	1
NM_008250	chr1	186431580	186431679	1
NM_027036	chr4	127768647	127768783	1
NM_010445	chr5	35706518	35706725	1
NM_133255	chr8	87877834	87877981	1
NM_008263	chr6	52165199	52165385	1
NM_010450	chr6	52175137	52175246	1
NM_010452	chr6	52123590	52124004	1
NM_010455	chr6	52146932	52147339	1
NM_008267	chr11	96011868	96012055	1
NM_010459	chr11	96133748	96134130	1
NM_008269	chr11	96115081	96115370	1
NM_010461	chr11	96100681	96100987	1
NM_008270	chr11	96094115	96094304	1
NM_010463	chr15	102762229	102762338	1
NM_010464	chr15	102758966	102759983	1
NM_010465	chr15	102832682	102832795	1
NM_010466	chr15	102817994	102818246	1
NM_013554	chr2	74494807	74494987	1
NM_008275	chr2	74470491	74470855	1
NM_013555	chr2	74500655	74500867	1
NM_080634	chr3	20232789	20233036	1
NM_017371	chr7	105460940	105461113	1
NM_008287	chr15	34435496	34435744	1
NM_018805	chr11	63736176	63736595	1
NM_008301	chr12	77324396	77324766	1
NM_011020	chr3	40837325	40837469	1
NM_008307	chr16	18163474	18163650	1
NM_019564	chr7	130726545	130726766	1
NM_010493	chr9	20765842	20766167	1
NM_010495	chr2	152414256	152414531	1
NM_030244	chr2	30298835	30299104	1
NM_008327	chr1	175869016	175869222	1
NM_030694	chr7	140804520	140804630	1
NM_018854	chr11	78355066	78355244	1
NM_023670	chr6	49003303	49003527	1
NM_001025597	chr11	11598615	11598719	1
NM_010551	chr7	83611491	83611674	1
NM_010560	chr13	113583967	113584416	1
NM_011919	chr8	11550912	11551224	1
NM_153774	chr1	137246184	137246289	1
NM_008390	chr11	53611880	53612937	1
NM_008391	chr8	48236519	48236737	1
NM_026531	chr7	78783388	78783731	1
NM_027397	chr9	55341434	55341808	1
NM_013565	chr11	94889174	94889283	1
NM_008400	chr7	127079418	127079599	1
NM_133663	chr11	115823742	115823892	1
NM_023844	chr16	84651801	84652102	1
NM_001017426	chr11	69225223	69225442	1
NM_021566	chr2	163032588	163032734	1
NM_053092	chr8	114897735	114897968	1
NM_178929	chr19	45131279	45131490	1
NM_008420	chr2	166782120	166782223	1
NM_008425	chr11	111087515	111087624	1
NM_001025590	chr16	94965237	94965382	1
NM_010607	chr1	191043421	191043597	1
NM_001033876	chr15	72372721	72373234	1
NM_010158	chr15	68821155	68821267	1
NM_145588	chr7	126834038	126834209	1
NM_130867	chr3	87232803	87232909	1
NM_029091	chr17	46104919	46105288	1
NM_020268	chr7	43915759	43916135	1
NM_145568	chr6	71200717	71201045	1
NM_028416	chr17	23468653	23468761	1
NM_010659	chr11	99872018	99872295	1
NM_212483	chr11	100090842	100090954	1
NM_010671	chr16	88640607	88640757	1
NM_183189	chr16	88596493	88596676	1
NM_183296	chr16	88851389	88851496	1
NM_130857	chr16	88766659	88766808	1
NM_133664	chr1	137633475	137633725	1
NM_024434	chr5	45783339	45784064	1
NM_033521	chr15	34182088	34182313	1
NM_172585	chr13	9087285	9087467	1
NM_026058	chr8	4491198	4491546	1
NM_172856	chr2	68633934	68634305	1
NM_010691	chr19	45287443	45287699	1
NM_010697	chr19	46110671	46111291	1
NM_010700	chr9	21471561	21471894	1
NM_145554	chr4	134038061	134038233	1
NM_010703	chr3	131099682	131100090	1
NM_008493	chr6	29008490	29008749	1
NM_020278	chr19	38385539	38385681	1
NM_008498	chr11	84343241	84343608	1
NM_010710	chr2	38175235	38175581	1
NM_008499	chr5	120693215	120693509	1
NM_010713	chr3	154265537	154265763	1
NM_010714	chr1	140662848	140662991	1
NM_145833	chr4	133295262	133295560	1
NM_010725	chr2	33459738	33460494	1
NM_198633	chrX	20518392	20518562	1
NM_001004166	chr11	117302714	117302897	1
NM_001013812	chr8	12398006	12398409	1
NM_001033784	chr9	121681702	121681807	1
NM_001039115	chr13	21491364	21491476	1
NM_001029930	chr14	4388149	4388434	1
NM_001077421	chr17	23685982	23686154	1
NM_172767	chr9	38469143	38469599	1
NM_178665	chr16	24307814	24307957	1
NM_008514	chr6	134536366	134536677	1
NM_028838	chr9	110796361	110796836	1
NM_175124	chr7	67519652	67519795	1
NM_027026	chr11	96853030	96853498	1
NM_001024619	chr7	98236119	98236262	1
NM_146191	chr7	66266444	66266552	1
NM_177727	chr2	179955330	179955434	1
NM_015816	chr8	73602427	73602802	1
NM_027366	chr17	34684888	34685070	1
NM_011837	chr15	75391729	75391867	1
NM_011838	chr15	74569518	74569647	1
NM_026671	chr15	74562651	74562927	1
NM_026092	chr18	3856644	3857011	1
NM_021500	chr5	33750294	33750402	1
NM_010658	chr2	160054691	160054832	1
NM_207010	chr12	68137323	68137431	1
NM_008548	chr10	53764433	53764804	1
NM_010763	chr3	100620360	100620468	1
NM_001029983	chr2	25153561	25153713	1
NM_011948	chr17	12167677	12167859	1
NM_013595	chr10	79800831	79801150	1
NM_001009949	chr4	45434325	45434465	1
NM_133197	chrX	56391908	56392114	1
NM_008562	chr3	95745133	95745422	1
NM_008564	chr6	88860912	88861097	1
NM_027830	chr10	53382750	53382952	1
NM_026656	chr3	146083488	146083638	1
NM_016766	chr15	99078270	99078416	1
NM_021442	chr3	30701935	30702290	1
NM_181407	chr7	89484079	89484224	1
NM_133665	chr3	88253700	88253875	1
NM_026220	chr2	121199496	121199679	1
NM_027422	chr10	78942026	78942166	1
NM_001039684	chr11	87667886	87668181	1
NM_177595	chr18	7002583	7002807	1
NM_027326	chr4	87503526	87503629	1
NM_139311	chr11	97502291	97502395	1
NM_001033450	chr1	175749680	175749782	1
NM_177448	chr7	99123828	99124309	1
NM_008622	chr5	31420118	31420355	1
NM_008624	chr9	99249358	99249532	1
NM_153067	chr7	47468931	47469040	1
NM_029963	chr2	127281527	127281639	1
NM_010830	chr17	87824069	87824219	1
NM_010835	chr5	38116994	38117927	1
NM_010836	chr7	139899537	139899710	1
NM_008630	chr8	97062703	97062995	1
NM_013605	chr3	89314552	89314731	1
NM_133250	chr4	116310585	116310692	1
NM_016662	chr13	55338844	55338959	1
NM_019660	chr4	123416972	123417116	1
NM_008709	chr12	12969302	12969648	1
NM_010851	chr9	119188120	119188311	1
NM_178440	chr11	6424023	6424302	1
NM_133363	chr18	60727989	60728134	1
NM_172607	chr15	75721253	75721881	1
NM_016777	chr4	116124559	116124709	1
NM_011986	chr4	126250870	126250977	1
NM_008678	chr1	13111099	13111316	1
NM_019825	chr2	155150144	155150277	1
NM_023317	chr16	14077946	14078156	1
NM_008306	chr18	60837581	60837689	1
NM_010811	chr14	19521842	19521975	1
NM_024197	chr1	94303448	94303616	1
NM_026614	chr6	24476760	24477228	1
NM_025843	chr8	86457544	86457650	1
NM_025383	chr4	140349415	140349560	1
NM_198429	chr18	80876144	80876420	1
NM_017373	chr13	52992420	52992534	1
NM_008690	chr17	45018311	45018454	1
NM_183091	chr15	76458190	76458447	1
NM_020045	chr6	86975392	86975510	1
NM_009123	chr7	132434573	132434713	1
NM_001077632	chr2	146873183	146873434	1
NM_008699	chr19	43666878	43666990	1
NM_008700	chr17	26567893	26568027	1
NM_029447	chr13	105229730	105229954	1
NM_008704	chr11	93787785	93787969	1
NM_026393	chr16	4639008	4639623	1
NM_133702	chr11	107004450	107004838	1
NM_027528	chr1	172425189	172425454	1
NM_172204	chr2	24914665	24914809	1
NM_013780	chr12	54169131	54169286	1
NM_133192	chr5	90957855	90958345	1
NM_199469	chr11	120197072	120197174	1
NM_010151	chr13	78659352	78659619	1
NM_009697	chr7	70231679	70231935	1
NM_013613	chr2	56930689	56930867	1
NM_139051	chr2	38533166	38533616	1
NM_010937	chr3	103189079	103189415	1
NM_001036293	chr10	66683108	66683343	1
NM_001077407	chr1	62638230	62638339	1
NM_008738	chr17	56445258	56445373	1
NM_010942	chr5	38446421	38446715	1
NM_026330	chr7	125282844	125283336	1
NM_027289	chr14	29916656	29916767	1
NM_021320	chr10	93099945	93100055	1
NM_026497	chr17	60477555	60477897	1
NM_175749	chr13	46739023	46739325	1
NM_170591	chr14	59156675	59156885	1
NM_033039	chr5	144308641	144308915	1
NM_013614	chr8	125733242	125733385	1
NM_011858	chr7	96083431	96083834	1
NM_146465	chr17	37061221	37061395	1
NM_146985	chr2	89950159	89950341	1
NM_001011525	chr1	94323833	94323977	1
NM_146357	chr16	19444146	19444355	1
NM_001005524	chr16	59057539	59057778	1
NM_146709	chr11	74163481	74163633	1
NM_001011528	chr6	42448224	42448363	1
NM_001011814	chr7	140059559	140059667	1
NM_147093	chr7	102578138	102578251	1
NM_146822	chr7	103895308	103895563	1
NM_147095	chr7	104906217	104906372	1
NM_146600	chr7	106599570	106599677	1
NM_146284	chr10	128722513	128722624	1
NM_147107	chr9	39689708	39689845	1
NM_146367	chr9	39724151	39724260	1
NM_016967	chr16	91112267	91112478	1
NM_008262	chr9	74646806	74647057	1
NM_194268	chr18	64467485	64467661	1
NM_181753	chr17	41778933	41779159	1
NM_011012	chr2	181646498	181646803	1
NM_011959	chr5	22442452	22442593	1
NM_020622	chr16	97658314	97658423	1
NM_025661	chr11	98408137	98408242	1
NM_207530	chr18	13085079	13085483	1
NM_011859	chr12	9604979	9605660	1
NM_054049	chr15	35243205	35243341	1
NM_153114	chr1	94483667	94483774	1
NM_001039223	chr2	118867270	118867373	1
NM_027571	chr3	59432598	59432924	1
NM_145579	chr7	18157315	18157487	1
NM_027470	chr7	28305301	28305506	1
NM_023792	chr19	34998844	34998994	1
NM_008780	chr2	147057884	147058200	1
NM_008782	chr4	44733683	44734392	1
NM_013627	chr2	105474982	105475225	1
NM_011039	chr4	139104231	139104451	1
NM_011041	chr12	57610082	57610455	1
NM_029357	chr18	38337047	38337397	1
NM_011043	chr3	45475298	45475854	1
NM_053141	chr18	37605339	37605451	1
NM_033593	chr18	37875861	37876010	1
NM_033595	chr18	37896721	37897705	1
NM_033577	chr18	37857525	37857632	1
NM_033578	chr18	37868523	37868809	1
NM_144868	chr19	5667607	5667818	1
NM_008788	chr5	137840029	137840673	1
NM_153565	chr4	105940150	105940324	1
NM_016688	chr9	65142992	65143273	1
NM_012065	chr11	120266084	120266304	1
NM_011057	chr15	79847261	79847368	1
NM_011058	chr5	75433144	75433540	1
NM_021517	chr3	96936285	96936427	1
NM_173019	chr9	108850674	108850778	1
NM_021514	chr15	97942309	97942485	1
NM_028716	chr2	34736376	34736741	1
NM_001039536	chr11	62347814	62348183	1
NM_001077636	chr11	84709347	84709571	1
NM_001001983	chr16	17188210	17188320	1
NM_008842	chr17	29219758	29220049	1
NM_008844	chr10	80723410	80723742	1
NM_198191	chr2	32405602	32405895	1
NM_011097	chr13	55838795	55839016	1
NM_011098	chr3	129189827	129189972	1
NM_178654	chr3	142824480	142824839	1
NM_001029838	chr9	36894674	36894935	1
NM_152813	chr11	102913838	102914081	1
NM_008875	chr3	28455346	28455617	1
NM_172743	chr7	115982152	115982302	1
NM_024413	chr7	37936282	37936423	1
NM_153804	chr12	77451218	77451331	1
NM_026385	chr8	97582888	97583101	1
NM_001039509	chr1	74242185	74242513	1
NM_015810	chr11	106594817	106595047	1
NM_029977	chr16	36928133	36928399	1
NM_015784	chr3	54448918	54449027	1
NM_008899	chr4	22579916	22580019	1
NM_138944	chr8	81331567	81331921	1
NM_138945	chr18	42520922	42521173	1
NM_011151	chr17	84879656	84879991	1
NM_176833	chr16	16813342	16813486	1
NM_133819	chr1	134956641	134956811	1
NM_029948	chr4	143669982	143670161	1
NM_007548	chr10	44145629	44145735	1
NM_001033217	chr15	93332028	93332235	1
NM_008923	chr5	139402221	139402703	1
NM_008855	chr7	122422510	122422731	1
NM_011104	chr17	86015438	86015551	1
NM_011172	chr16	18002531	18002895	1
NM_008937	chr1	191872412	191872769	1
NM_145589	chr7	127315556	127315775	1
NM_172487	chr6	113465290	113465584	1
NM_029614	chr7	89392056	89392496	1
NM_175440	chr17	23750709	23750881	1
NM_010724	chr17	33812983	33813125	1
NM_011874	chr7	27778590	27778805	1
NM_010817	chr8	110476356	110476675	1
NM_001077363	chr10	79262939	79263125	1
NM_018809	chr2	19362523	19362815	1
NM_011199	chr9	110590575	110590745	1
NM_008971	chr15	94418874	94419922	1
NM_011200	chr1	30764096	30764273	1
NM_013935	chr2	13973247	13973458	1
NM_023587	chr16	34936945	34937055	1
NM_011201	chr2	167699260	167699623	1
NM_008984	chr17	67257700	67257887	1
NM_011214	chr4	131109627	131110053	1
NM_019700	chr5	111015566	111015750	1
NM_008990	chr7	18900438	18900913	1
NM_021495	chr16	46415919	46416043	1
NM_029546	chr10	77576307	77576557	1
NM_026405	chr10	10303259	10303763	1
NM_025887	chr17	52943403	52943743	1
NM_009005	chr6	88003284	88003459	1
NM_030566	chr7	126221389	126221494	1
NM_009008	chr15	78403677	78403785	1
NM_009067	chr17	65771842	65772120	1
NM_011244	chr15	102084693	102084836	1
NM_001017427	chr4	73261938	73262053	1
NM_013833	chr18	66062781	66062979	1
NM_009826	chr1	5906615	5906753	1
NM_172517	chr1	134299707	134299845	1
NM_175023	chr7	122770391	122770497	1
NM_016809	chrX	7302312	7302427	1
NM_176838	chr8	109026452	109027574	1
NM_023131	chr19	4625029	4625306	1
NM_130454	chr11	115697581	115697731	1
NM_011263	chr5	78337147	78337459	1
NM_009063	chr1	171487333	171487591	1
NM_001029938	chr11	75328780	75328964	1
NM_009068	chr13	34010401	34010696	1
NM_011882	chr1	155512562	155512899	1
NM_028810	chr2	50970234	50970496	1
NM_153503	chrX	33626837	33627014	1
NM_011276	chrX	100189688	100189961	1
NM_026301	chr18	21085752	21086127	1
NM_001033142	chr8	125356694	125356810	1
NM_028783	chr9	37183965	37184252	1
NM_013646	chr9	67953140	67953501	1
NM_024218	chr16	55889142	55889349	1
NM_025425	chr17	24459789	24459970	1
NM_025433	chr17	46239067	46239279	1
NM_207635	chr14	23322935	23323046	1
NM_021485	chr19	4166043	4166191	1
NM_173450	chr2	118728425	118728567	1
NM_028040	chr9	35017840	35018051	1
NM_199476	chr15	38021801	38022495	1
NM_025517	chr3	116501960	116502091	1
NM_013648	chr7	18439719	18440220	1
NM_130892	chr10	43689409	43689815	1
NM_019732	chr4	134423711	134423923	1
NM_028188	chr3	89177972	89178083	1
NM_019743	chr6	100251567	100251684	1
NM_023868	chr13	12231488	12231988	1
NM_178280	chr18	81150064	81150219	1
NM_175303	chr2	168455852	168456291	1
NM_009129	chr1	79259686	79259794	1
NM_016717	chr1	93151735	93152098	1
NM_133199	chr11	106166970	106167194	1
NM_001077499	chr15	100882487	100882965	1
NM_027013	chr3	95218490	95218596	1
NM_011327	chr4	107616121	107616233	1
NM_025441	chr12	70277021	70277157	1
NM_172800	chr11	113887950	113888198	1
NM_144520	chr11	3997300	3997407	1
NM_016906	chr6	88486393	88486498	1
NM_029279	chr13	51703864	51704194	1
NM_009150	chr3	95018172	95018278	1
NM_013660	chr13	51740990	51741238	1
NM_011350	chr6	82852001	82852110	1
NM_027838	chr9	59547080	59547192	1
NM_001034870	chr12	104663659	104664024	1
NM_008878	chr11	75257107	75257215	1
NM_013834	chr8	24876451	24876606	1
NM_018780	chr19	42253342	42253626	1
NM_009160	chr14	40098253	40098936	1
NM_011890	chr5	73927800	73927906	1
NM_013731	chr2	162673790	162674010	1
NM_008507	chr5	122091968	122092112	1
NM_011368	chr3	89510927	89511104	1
NM_199022	chr2	125417661	125417767	1
NM_009172	chr8	89778228	89778725	1
NM_011376	chr10	50583828	50584471	1
NM_178848	chr13	43404887	43405066	1
NM_011380	chr17	85594702	85594951	1
NM_011381	chr17	85525706	85525920	1
NM_173403	chr5	73291771	73292032	1
NM_009195	chr8	108835113	108835323	1
NM_028122	chr18	78285608	78285772	1
NM_030683	chr18	78366547	78366690	1
NM_146076	chr17	28377726	28378032	1
NM_011978	chr2	126243507	126244252	1
NM_007854	chr19	5033100	5033386	1
NM_009579	chr1	193609261	193609447	1
NM_022885	chr13	102051992	102052135	1
NM_023214	chr3	115996528	115996665	1
NM_009508	chr2	158303536	158303672	1
NM_080854	chr2	25053720	25053982	1
NM_027216	chr11	113384123	113384232	1
NM_028051	chr10	127802404	127802623	1
NM_177388	chr10	82770707	82770985	1
NM_009208	chr1	75518924	75519067	1
NM_144512	chr6	121263397	121264078	1
NM_009209	chr8	95851071	95851239	1
NM_144852	chr16	17491702	17492025	1
NM_011404	chr8	124792038	124792358	1
NM_175316	chr7	99586715	99587005	1
NM_010754	chr18	76366273	76366489	1
NM_028534	chr1	23878310	23878609	1
NM_053123	chrX	44136042	44136253	1
NM_031878	chr11	106084055	106084201	1
NM_027885	chr15	102999885	103000025	1
NM_033568	chr11	95849929	95850513	1
NM_015782	chr7	26905278	26905532	1
NM_021335	chr2	142550889	142551068	1
NM_007707	chr11	117791069	117791250	1
NM_009235	chr11	69471999	69472216	1
NM_145464	chr14	117117896	117118081	1
NM_177082	chr12	119684570	119684793	1
NM_017407	chr11	78134683	78135370	1
NM_027649	chr17	44944350	44944460	1
NM_028561	chr5	27830344	27830446	1
NM_013675	chr12	77626764	77626904	1
NM_026335	chr3	92849245	92849455	1
NM_029035	chr4	148799550	148799652	1
NM_029688	chr2	151774432	151774571	1
NM_178750	chr2	179974106	179974211	1
NM_133772	chr8	73536405	73537009	1
NM_009218	chr15	78367058	78367279	1
NM_024239	chr6	83533688	83533799	1
NM_029682	chr19	34258453	34258570	1
NM_009283	chr1	52058918	52059236	1
NM_019963	chr10	127684651	127684799	1
NM_213659	chr11	100755672	100756391	1
NM_011490	chr2	166656087	166656415	1
NM_009285	chr14	67979098	67979272	1
NM_027399	chr5	5804971	5805150	1
NM_019635	chr15	34821824	34821930	1
NM_028800	chr4	125627490	125627633	1
NM_011500	chr17	78661636	78661777	1
NM_021433	chr1	156997077	156997422	1
NM_172891	chr6	131282329	131282544	1
NM_011294	chr15	11939159	11939336	1
NM_011507	chr6	95685392	95685563	1
NM_028072	chr2	165848552	165848955	1
NM_173733	chr10	128073656	128073807	1
NM_013680	chrX	20078676	20078815	1
NM_013722	chr10	85724578	85724787	1
NM_019666	chr9	88319623	88319966	1
NM_021314	chr7	130569063	130569324	1
NM_021441	chr8	122490914	122491068	1
NM_033074	chr15	11344555	11344918	1
NM_019786	chr10	120993896	120994078	1
NM_009324	chr11	85646762	85647133	1
NM_001037877	chr8	126290366	126290581	1
NM_009331	chr11	52123790	52124045	1
NM_011547	chr13	40745657	40745924	1
NM_198960	chr4	126235976	126236271	1
NM_023755	chr1	120452898	120453188	1
NM_011548	chr10	79841780	79841995	1
NM_027762	chr3	93530952	93531311	1
NM_013775	chr12	105545305	105545532	1
NM_013688	chr17	44993366	44993583	1
NM_011562	chr9	110792485	110793167	1
NM_009346	chr7	112548224	112548333	1
NM_011579	chr11	48836041	48836225	1
NM_011568	chr11	120410340	120410564	1
NM_025435	chr14	12708785	12708894	1
NM_009379	chr16	20643037	20643149	1
NM_011589	chr10	127650022	127650418	1
NM_010744	chr9	21260035	21260357	1
NM_023438	chr11	82199858	82200184	1
NM_025889	chr19	4131572	4131792	1
NM_177648	chr2	30107921	30108146	1
NM_178642	chr7	144419134	144419350	1
NM_175106	chr1	121763813	121763918	1
NM_027865	chr9	44549672	44549847	1
NM_199305	chr4	129180815	129180995	1
NM_172614	chr16	30472282	30472736	1
NM_025452	chr4	128606698	128606882	1
NM_172583	chr12	87910544	87910687	1
NM_026436	chr7	46915905	46916048	1
NM_027902	chr15	78296797	78297013	1
NM_022418	chr5	23956172	23956425	1
NM_011613	chr14	77458068	77458475	1
NM_009404	chr17	56790335	56790519	1
NM_011618	chr7	4111356	4111561	1
NM_028011	chr11	90479580	90479919	1
NM_172609	chr15	79496514	79496696	1
NM_025394	chr5	23351701	23351926	1
NM_009413	chr10	31151312	31151520	1
NM_001001491	chr8	75060514	75060661	1
NM_009418	chr1	43842198	43842622	1
NM_009419	chr5	112538243	112538346	1
NM_009429	chr14	74578690	74578937	1
NM_001033161	chr8	108152254	108152401	1
NM_175114	chr9	121148564	121148673	1
NM_144554	chr2	152029901	152030047	1
NM_020286	chr7	142817534	142817648	1
NM_028209	chr4	106203337	106203605	1
NM_177709	chr11	76496273	76496510	1
NM_016792	chr18	63511173	63511498	1
NM_001042523	chr10	82240146	82240490	1
NM_011662	chr7	30122676	30122926	1
NM_011666	chr6	97173204	97173462	1
NM_009457	chrX	19820323	19820503	1
NM_145578	chr7	11936761	11936946	1
NM_026275	chr4	41320990	41321291	1
NM_027086	chr9	57703619	57703725	1
NM_009469	chr5	111048934	111049316	1
NM_011676	chr11	78160860	78160969	1
NM_029770	chr10	60224335	60224614	1
NM_030680	chr8	73283103	73283281	1
NM_175309	chr5	136339093	136339235	1
NM_001033202	chr5	114357546	114357940	1
NM_009501	chr19	59221333	59221554	1
NM_177393	chr14	122433835	122433942	1
NM_027889	chr9	44110298	44110629	1
NM_025842	chr15	76452812	76453193	1
NM_177033	chr11	11014842	11015092	1
NM_153085	chr18	8137363	8137603	1
NM_011710	chr12	109332966	109333178	1
NM_145218	chr5	131591323	131591504	1
NM_172882	chr5	102077138	102077431	1
NM_178739	chrX	41336552	41336663	1
NM_001033500	chr9	74007307	74007444	1
NM_011915	chr10	120485793	120485910	1
NM_029361	chr13	48966765	48966913	1
NM_009520	chr3	105089006	105089218	1
NM_009526	chr1	74704836	74705197	1
NM_009528	chr15	85407486	85407840	1
NM_021539	chr5	117617422	117618108	1
NM_144783	chr2	104926403	104926650	1
NM_013753	chr10	60751037	60751554	1
NM_001011874	chr1	3661020	3661135	1
NM_028816	chr7	125878444	125878586	1
NM_023045	chr14	69409607	69409793	1
NM_145828	chr11	94484442	94484546	1
NM_023784	chr5	69734598	69734709	1
NM_173761	chr2	180852604	180852711	1
NM_011738	chr5	33336344	33336561	1
NM_011740	chr15	36740722	36740967	1
NM_153398	chr10	41111369	41111773	1
NM_145356	chr18	76178748	76179104	1
NM_148926	chr17	29613231	29613387	1
NM_198644	chr15	68022600	68022857	1
NM_172462	chr5	129950818	129951033	1
NM_011980	chr7	29856351	29856534	1
NM_001033425	chr17	23328560	23328888	1
NM_027248	chr14	50943377	50943775	1
NM_001001792	chr6	117838775	117838924	1
NM_138949	chr11	62610048	62610490	1
NM_177758	chr4	128084200	128084497	1
NM_011756	chr7	28090388	28090573	1
NM_178679	chr10	67115747	67115852	1
NM_007564	chr12	81031232	81031440	1
NM_033327	chr8	90784997	90785097	1
NM_177811	chr13	67925335	67925681	1
NM_145459	chr14	20779824	20780037	1
NM_026107	chr11	65792292	65792405	1
NM_152814	chr7	29798536	29798850	1
NM_001013745	chr17	36610073	36610465	1
NM_024215	chr4	133522815	133523199	1
NM_009560	chr7	27436376	27436519	1
NM_001013012	chr7	5761704	5761931	1
NM_028054	chr2	118904219	118904406	1
NM_009573	chr9	91161269	91161994	1
NM_022987	chr14	121603544	121603689	1
NM_213614	chr16	18539252	18539366	0
NM_026169	chr19	5844690	5844882	0
NM_026169	chr19	5843282	5843501	0
NM_030141	chr17	56562369	56562708	0
NM_029389	chr14	33086701	33086859	0
NM_028469	chr5	139654716	139654829	0
NM_027640	chr8	98467202	98467746	0
NM_153577	chr7	30023974	30024290	0
NM_183167	chr7	41108307	41108542	0
NM_029121	chr17	86827158	86827438	0
NM_029121	chr17	86822851	86823139	0
NM_001001182	chr2	59934669	59934788	0
NM_001002781	chr2	20641995	20642100	0
NM_177916	chrX	57444888	57445183	0
NM_022021	chr18	11983318	11983546	0
NM_007625	chr11	118903914	118904139	0
NM_030137	chr2	30418458	30418593	0
NM_172911	chr8	37647968	37648113	0
NM_029974	chr3	89437849	89437951	0
NM_010056	chr6	6815725	6815912	0
NM_010056	chr6	6832403	6832642	0
NM_145831	chr19	25740649	25740881	0
NM_058212	chr12	84376206	84376315	0
NM_025869	chr8	32471267	32471470	0
NM_026530	chr17	55603080	55603413	0
NM_001005477	chr5	106697179	106697324	0
NM_021306	chr1	88984770	88984952	0
NM_023743	chr11	3092919	3093232	0
NM_010132	chr19	59510854	59510957	0
NM_019578	chr4	133652260	133652397	0
NM_153195	chr10	85448238	85448554	0
NM_153111	chr1	74817153	74817525	0
NM_010234	chr12	86363885	86364104	0
NM_008037	chr5	32414757	32414868	0
NM_008593	chr4	114319179	114319465	0
NM_010426	chr8	123965694	123965872	0
NM_010426	chr8	123971375	123971726	0
NM_011356	chr2	80248343	80248460	0
NM_008090	chr6	88161723	88161901	0
NM_178878	chr5	30428412	30428630	0
NM_010402	chr8	60212210	60212378	0
NM_010402	chr8	60215406	60215585	0
NM_133255	chr8	87881093	87881236	0
NM_008263	chr6	52167829	52167982	0
NM_010452	chr6	52102768	52103231	0
NM_010455	chr6	52143665	52143805	0
NM_013554	chr2	74492958	74493335	0
NM_008275	chr2	74467258	74467364	0
NM_008390	chr11	53621267	53621464	0
NM_023844	chr16	84657794	84658089	0
NM_178929	chr19	45129751	45129866	0
NM_029091	chr17	46094401	46094553	0
NM_172856	chr2	68659268	68659380	0
NM_010710	chr2	38171423	38171731	0
NM_008499	chr5	120687883	120688101	0
NM_001033784	chr9	121683075	121683268	0
NM_028838	chr9	110797985	110798194	0
NM_011838	chr15	74574442	74574588	0
NM_021500	chr5	33751738	33751879	0
NM_027422	chr10	78957230	78957449	0
NM_177595	chr18	7003820	7004007	0
NM_010835	chr5	38110674	38111434	0
NM_013605	chr3	89315704	89315884	0
NM_008709	chr12	12964697	12964908	0
NM_010151	chr13	78660017	78660174	0
NM_010937	chr3	103187840	103188165	0
NM_013614	chr8	125319512	125319612	0
NM_016967	chr16	91116322	91116526	0
NM_016967	chr16	91115377	91115690	0
NM_054049	chr15	35238755	35239075	0
NM_027571	chr3	59432024	59432140	0
NM_011041	chr12	57613478	57613617	0
NM_033595	chr18	37893172	37893390	0
NM_016688	chr9	65144011	65144334	0
NM_011097	chr13	55844265	55844454	0
NM_001039509	chr1	74241355	74241561	0
NM_008937	chr1	191874584	191874723	0
NM_008971	chr15	94421138	94421364	0
NM_008971	chr15	94418117	94418508	0
NM_009067	chr17	65785387	65785503	0
NM_199476	chr15	37927606	37927784	0
NM_007707	chr11	117789695	117789842	0
NM_213659	chr11	100757086	100757188	0
NM_021314	chr7	130520013	130520548	0
NM_019786	chr10	120988326	120988501	0
NM_027762	chr3	93533122	93533269	0
NM_011589	chr10	127647733	127648183	0
NM_011589	chr10	127651162	127651420	0
NM_028011	chr11	90508444	90508613	0
NM_009469	chr5	111047759	111048016	0
NM_001033202	chr5	114356842	114357215	0
NM_009501	chr19	59224207	59224406	0
NM_009520	chr3	105092074	105092221	0
NM_198644	chr15	68021480	68021620	0
NM_033327	chr8	90851008	90851123	0
NM_177811	chr13	67919363	67919627	0
NM_177811	chr13	67924413	67924689	0
