# Supplementary material for: Stat3 and c-Myc Genome-Wide Promoter Occupancy in Embryonic Stem Cells
Source: PLoS One. 2008 Dec 11;3(12):e3932. doi: 10.1371/journal.pone.0003932 (PMC2592696; doi:10.1371/journal.pone.0003932)
Supplement: Table S2 — c-Myc bound regions in murine ES cells (0.17 MB XLS) [file pone.0003932.s002.xls]

## Sheet: Sheet1
Table S2. c-Myc bound regions in murine ES cells
Refseq	chromosome	start	end	non-redundant
NM_027314	chr19	37273411	37273632	1
NM_213614	chr16	18594211	18594433	1
NM_025791	chr19	8838362	8838572	1
NM_026304	chr7	89815095	89816129	1
NM_025319	chr11	51533521	51533747	1
NM_027859	chr11	4036407	4036554	1
NM_001013414	chr11	69723822	69724095	1
NM_026724	chr3	130718114	130719059	1
NM_134054	chr12	55540799	55540976	1
NM_025365	chr17	47150730	47150940	1
NM_183275	chr11	79954868	79956078	1
NM_025364	chr10	128225075	128225371	1
NM_028661	chr7	28864575	28864799	1
NM_145955	chr7	128529942	128530277	1
NM_028632	chr12	85858308	85858677	1
NM_178066	chr10	128205098	128205241	1
NM_026808	chr14	54528806	54528933	1
NM_025402	chr11	121020045	121020258	1
NM_175123	chr2	91244749	91244991	1
NM_026501	chr11	100913600	100913748	1
NM_027918	chr9	103143927	103144097	1
NM_028791	chr17	29443387	29443635	1
NM_001005523	chr5	124009396	124009544	1
NM_024172	chr7	4287283	4287878	1
NM_026399	chr8	87969634	87969811	1
NM_029660	chr7	107002285	107002601	1
NM_173426	chr4	5572931	5573256	1
NM_028820	chr9	57054303	57054482	1
NM_029801	chr3	88382441	88382751	1
NM_026411	chr10	43227784	43227996	1
NM_025969	chr18	85085360	85085573	1
NM_027699	chr12	36720488	36720632	1
NM_029687	chr2	38828137	38828245	1
NM_025463	chr19	8954493	8955897	1
NM_025462	chr16	20524709	20524828	1
NM_026940	chr16	17061175	17061291	1
NM_025465	chr8	69414930	69415276	1
NM_028077	chr19	3707705	3708136	1
NM_027222	chr18	35775712	35775857	1
NM_027105	chr16	88539778	88539916	1
NM_029607	chr2	180654123	180654230	1
NM_026318	chr2	121148734	121149242	1
NM_027975	chr2	158476699	158476986	1
NM_146068	chr16	16059998	16060110	1
NM_025509	chr3	130699021	130699236	1
NM_001024919	chr11	31575277	31575383	1
NM_026760	chr8	87917666	87917986	1
NM_133714	chr15	98360577	98362040	1
NM_173735	chr12	87835472	87835762	1
NM_021329	chr11	68806821	68807069	1
NM_025542	chr2	172131547	172131670	1
NM_025880	chr7	44115423	44116148	1
NM_025879	chr13	105298486	105298601	1
NM_029621	chr8	74200748	74201032	1
NM_023203	chr7	127051139	127051780	1
NM_026113	chr10	39946368	39946550	1
NM_023633	chr12	84811251	84811559	1
NM_028603	chr4	128882886	128882992	1
NM_026630	chr2	162779081	162779224	1
NM_029742	chr6	30351189	30351409	1
NM_175245	chr14	97928131	97928427	1
NM_029747	chr17	36597538	36597858	1
NM_026480	chr9	78162745	78163029	1
NM_023215	chr3	90594683	90594859	1
NM_001033164	chr16	18750910	18751058	1
NM_029748	chr4	129109477	129109621	1
NM_026455	chr8	75150978	75151194	1
NM_172947	chr11	102000379	102000704	1
NM_028244	chr17	31764637	31765166	1
NM_001033134	chr4	154086331	154086505	1
NM_028101	chr17	25556950	25557084	1
NM_025575	chr2	164149900	164150146	1
NM_025665	chr6	86650668	86650842	1
NM_028263	chr19	36898643	36898905	1
NM_183287	chr16	17038273	17038627	1
NM_025599	chr16	57528264	57528408	1
NM_025952	chrX	102214876	102215315	1
NM_178625	chr6	30458808	30459656	1
NM_001033166	chr2	84470622	84470792	1
NM_027265	chr14	25940786	25941184	1
NM_025615	chr8	127748434	127749030	1
NM_001048250	chr13	109164262	109164548	1
NM_028315	chr14	97981754	97982042	1
NM_172859	chr2	144157623	144157806	1
NM_028814	chr3	88770890	88770997	1
NM_175239	chr11	120036229	120036393	1
NM_024428	chr17	74223055	74223298	1
NM_023363	chr7	41372664	41373336	1
NM_026041	chr1	188448880	188449167	1
NM_027278	chr4	41901187	41901723	1
NM_144518	chr16	14037338	14037511	1
NM_145221	chr14	25796759	25796906	1
NM_197959	chr11	102741903	102742070	1
NM_026522	chr7	141390130	141390745	1
NM_027532	chr7	101770776	101771138	1
NM_025699	chr2	163094697	163094917	1
NM_026140	chr7	121857442	121857899	1
NM_026313	chr11	94136869	94137565	1
NM_025708	chr16	8551819	8552094	1
NM_199009	chr7	105273223	105273448	1
NM_175307	chr4	132770207	132770339	1
NM_026150	chr11	3793555	3793830	1
NM_029432	chr2	130530201	130530525	1
NM_028654	chr7	133247357	133247633	1
NM_029037	chr8	27457170	27457379	1
NM_133858	chr3	95373225	95373437	1
NM_021529	chr12	56221469	56222216	1
NM_026290	chr17	28246801	28247148	1
NM_029247	chr9	53165951	53166442	1
NM_026668	chr3	30890713	30890821	1
NM_172741	chr7	33959793	33959902	1
NM_027640	chr8	98467202	98467496	1
NM_028908	chr8	128370072	128370269	1
NM_173778	chr9	54302860	54303119	1
NM_027702	chr7	42278153	42278824	1
NM_027500	chr3	90138893	90139529	1
NM_001004146	chr11	3029812	3030418	1
NM_198642	chr14	73750727	73750909	1
NM_029081	chr6	143124349	143124735	1
NM_146096	chr19	21741111	21741296	1
NM_197940	chr11	98679054	98679306	1
NM_146091	chr19	7562179	7562566	1
NM_183264	chr10	129873485	129873697	1
NM_029086	chr4	46409914	46411384	1
NM_176976	chr9	15108408	15109021	1
NM_133934	chr6	87803837	87804091	1
NM_145412	chr8	109782893	109783223	1
NM_177158	chr7	28505315	28505421	1
NM_001039586	chr9	106026454	106026758	1
NM_134022	chr11	70877597	70877741	1
NM_144905	chr4	63044331	63044659	1
NM_029532	chr5	124744253	124744452	1
NM_176952	chr8	37846147	37846249	1
NM_198652	chr1	90107589	90108168	1
NM_177374	chr12	112126006	112126512	1
NM_028984	chr2	143962374	143963071	1
NM_176849	chr8	8688995	8689132	1
NM_001033187	chr4	116620261	116620613	1
NM_001076791	chr13	67982799	67983091	1
NM_172380	chr16	38469554	38469845	1
NM_177573	chr4	124439541	124439643	1
NM_001033396	chr7	55830900	55831075	1
NM_001033348	chr2	146202933	146203099	1
NM_001002785	chr6	124884230	124884372	1
NM_172447	chr5	5705477	5705698	1
NM_173766	chr5	110783830	110784118	1
NM_177255	chr11	29072359	29072685	1
NM_029870	chr17	26441543	26441820	1
NM_175692	chr2	158063617	158063835	1
NM_199447	chr19	41949307	41949565	1
NM_172379	chr14	19137311	19137591	1
NM_146217	chr8	113931609	113931881	1
NM_029020	chr5	23917707	23917968	1
NM_001033336	chr14	117584252	117584394	1
NM_015751	chr8	82606852	82607031	1
NM_009338	chr17	12788751	12789001	1
NM_025988	chr11	102929605	102930046	1
NM_023190	chr14	53608778	53608923	1
NM_134037	chr11	100338444	100338596	1
NM_153420	chr9	96696345	96696638	1
NM_007393	chr5	143171532	143171643	1
NM_009609	chr11	120163438	120163610	1
NM_134156	chr12	81108262	81108556	1
NM_023735	chr1	127263683	127263861	1
NM_001033369	chr2	58137699	58137842	1
NM_007400	chr7	134063904	134064081	1
NM_011780	chr1	63375967	63376217	1
NM_007404	chr8	26482081	26482230	1
NM_172619	chr17	33131554	33131922	1
NM_001012765	chr16	35075282	35075455	1
NM_197985	chr6	119382073	119382360	1
NM_182928	chr15	89148339	89148449	1
NM_001008533	chr1	136051396	136051541	1
NM_028121	chr9	59090006	59090376	1
NM_007420	chr18	62304648	62304902	1
NM_027130	chr18	67573367	67573476	1
NM_026792	chr8	18845696	18846023	1
NM_007427	chr8	108455549	108455868	1
NM_009642	chr4	146930007	146930119	1
NM_026203	chr10	20573153	20573343	1
NM_199199	chr11	78327907	78328192	1
NM_172453	chr9	65385413	65385745	1
NM_145505	chr19	57410326	57410615	1
NM_133840	chr2	84526918	84527429	1
NM_001033139	chr19	7450049	7450152	1
NM_177869	chr5	20937338	20937776	1
NM_175178	chr16	17403054	17403309	1
NM_001042541	chr11	88681195	88681594	1
NM_019921	chr11	61745306	61745494	1
NM_031185	chr10	6078534	6079085	1
NM_019774	chr17	32051542	32052201	1
NM_007431	chr4	137066341	137066564	1
NM_026270	chr7	44717538	44717683	1
NM_008525	chr4	62006447	62007033	1
NM_198027	chr7	29992659	29992829	1
NM_007440	chr11	70076944	70077056	1
NM_011787	chr8	96901944	96902151	1
NM_008569	chr2	128377494	128377640	1
NM_001038230	chr11	120415166	120415494	1
NM_181394	chr9	102481292	102481543	1
NM_021421	chr1	192628457	192628667	1
NM_020581	chr17	33387620	33387727	1
NM_030886	chr5	91439989	91440181	1
NM_001012450	chr4	33190310	33190461	1
NM_130889	chr4	46473703	46474589	1
NM_023210	chr3	96014106	96014425	1
NM_133872	chr4	135872571	135873025	1
NM_009686	chr5	66899065	66899315	1
NM_009687	chr14	49847118	49847430	1
NM_009694	chr17	47904137	47904263	1
NM_009703	chrX	20005843	20005989	1
NM_181416	chr2	113648707	113649036	1
NM_153800	chr14	32046751	32047083	1
NM_021493	chr11	97263892	97264159	1
NM_001037727	chr6	87464012	87464234	1
NM_133796	chr11	120397938	120398772	1
NM_027871	chr14	26254911	26255351	1
NM_177305	chr1	90531241	90531491	1
NM_029466	chr2	14972394	14972543	1
NM_001034858	chr10	41711715	41711825	1
NM_028809	chr2	38832281	38832553	1
NM_031405	chr5	137537704	137538037	1
NM_009713	chr15	89304374	89304617	1
NM_029847	chr13	76562304	76562524	1
NM_007492	chrX	89541160	89541268	1
NM_025758	chr3	153731495	153732103	1
NM_019652	chr8	87915010	87915183	1
NM_172421	chr12	3426285	3426573	1
NM_179203	chr4	154603843	154604284	1
NM_007497	chr15	100055378	100055516	1
NM_009715	chr2	73693994	73694219	1
NM_146065	chr15	102452402	102452668	1
NM_025770	chr13	91687537	91687712	1
NM_133224	chr8	72721233	72721455	1
NM_007505	chr18	77978673	77978851	1
NM_016774	chr10	127486507	127486941	1
NM_020615	chr2	9997797	9998023	1
NM_025983	chr2	174105982	174106525	1
NM_007506	chr11	95890575	95890998	1
NM_026468	chr15	102498044	102498660	1
NM_175015	chr2	73711087	73711191	1
NM_013795	chr9	44671933	44672597	1
NM_018794	chrX	70550528	70550634	1
NM_080467	chr6	38034989	38035096	1
NM_013477	chr8	108453092	108453203	1
NM_007510	chr6	120630805	120631055	1
NM_007512	chr4	131804585	131805127	1
NM_029705	chr12	102358019	102358570	1
NM_212449	chr9	50368653	50368892	1
NM_177629	chr14	76822018	76822195	1
NM_011497	chr2	172061331	172061643	1
NM_134067	chr13	14422658	14422805	1
NM_145376	chr13	73962475	73962737	1
NM_001024917	chr5	65978014	65978121	1
NM_172124	chr1	23337913	23338031	1
NM_016888	chr11	22633972	22634291	1
NM_145222	chr1	88131131	88131278	1
NM_198884	chr6	120258285	120258433	1
NM_177897	chr7	140908088	140908258	1
NM_026121	chr8	27186660	27186763	1
NM_001038231	chr19	5365839	5366340	1
NM_016812	chr8	124860795	124861076	1
NM_007525	chr1	71035339	71035633	1
NM_019693	chr17	34850963	34851142	1
NM_007527	chr7	45333847	45334140	1
NM_145591	chr8	4676008	4676359	1
NM_030560	chr2	77746359	77746673	1
NM_146169	chr6	83807125	83807259	1
NM_145946	chr7	79266055	79266160	1
NM_145972	chr16	44644317	44644626	1
NM_173738	chr7	29569079	29569367	1
NM_145943	chr1	182687882	182688254	1
NM_172758	chr8	98741682	98741869	1
NM_177569	chr4	147795474	147795723	1
NM_177673	chr4	152850632	152850816	1
NM_001033485	chr8	124794611	124794821	1
NM_198301	chr15	27690981	27691088	1
NM_001001493	chr8	87970997	87971212	1
NM_198631	chr7	15561501	15561820	1
NM_198603	chr6	115805865	115806083	1
NM_198625	chr8	113608438	113608928	1
NM_001030307	chrX	71348870	71349944	1
NM_026602	chr3	103300293	103300660	1
NM_177410	chr1	108545629	108545812	1
NM_009745	chr5	135453731	135453836	1
NM_021486	chr8	120043032	120043160	1
NM_145388	chr8	87901861	87902007	1
NM_009751	chr2	143557739	143557993	1
NM_007465	chr9	7837912	7838368	1
NM_001012273	chr11	117674784	117675077	1
NM_007549	chr14	62372493	62372826	1
NM_013481	chr15	76304157	76304306	1
NM_011794	chr1	187032324	187032530	1
NM_009765	chr5	150790400	150790786	1
NM_001025387	chr17	33728093	33728540	1
NM_001003920	chr7	4305236	4305494	1
NM_145125	chr16	96191984	96192272	1
NM_026495	chr2	25943365	25943585	1
NM_025788	chr8	87576797	87577043	1
NM_027453	chr4	108331778	108332070	1
NM_007570	chr1	135897373	135897486	1
NM_023323	chr10	39936704	39936845	1
NM_026396	chr15	10430012	10430273	1
NM_016859	chr17	47073666	47074156	1
NM_145472	chr15	76550488	76550821	1
NM_177842	chr2	33466729	33466841	1
NM_178684	chr14	46220784	46221039	1
NM_145974	chr11	51483319	51483502	1
NM_172722	chr5	121659182	121659768	1
NM_011274	chr7	37727298	37727705	1
NM_177623	chr13	94201395	94201502	1
NM_023341	chr1	182031590	182031773	1
NM_022021	chr18	11983318	11983546	1
NM_001037099	chr2	52498921	52499091	1
NM_009786	chr1	162047592	162048678	1
NM_023525	chr5	31331682	31332039	1
NM_007589	chr17	87356008	87356338	1
NM_007594	chr6	29297183	29297539	1
NM_007595	chr11	5965732	5966009	1
NM_001025617	chr11	118235436	118235551	1
NM_007597	chr11	50167959	50168092	1
NM_021894	chr7	28588102	28588219	1
NM_007602	chr7	98024247	98024395	1
NM_011797	chr3	95987548	95987782	1
NM_019513	chrX	159377927	159378062	1
NM_013742	chr7	143408802	143408914	1
NM_199038	chr2	121557810	121557918	1
NM_011997	chr4	32986220	32986855	1
NM_144811	chr15	79764267	79764496	1
NM_172404	chr2	30027395	30027646	1
NM_001033533	chr8	97797543	97797674	1
NM_027159	chr1	34382843	34382979	1
NM_026964	chr8	73796159	73796405	1
NM_144527	chr4	133407378	133407486	1
NM_145944	chr14	64791112	64791332	1
NM_198645	chr16	35992078	35992590	1
NM_026028	chr6	120329263	120329508	1
NM_172297	chr7	15445083	15445254	1
NM_172301	chr13	101886143	101886517	1
NM_007631	chr7	144749724	144750602	1
NM_007633	chr7	37815262	37815426	1
NM_007634	chr17	23978372	23978517	1
NM_009831	chr11	40599012	40599252	1
NM_028399	chr1	129601141	129601248	1
NM_009916	chr9	114349500	114349800	1
NM_009835	chr17	8085015	8085187	1
NM_009837	chr11	22890055	22890455	1
NM_007637	chr15	31545251	31545759	1
NM_009838	chr5	130102540	130102685	1
NM_007638	chr6	85417993	85418732	1
NM_009840	chr16	87384432	87384744	1
NM_009853	chr11	69481951	69482306	1
NM_139291	chr4	61894347	61894596	1
NM_011799	chr11	98724443	98724547	1
NM_023284	chr1	171367914	171368032	1
NM_025866	chr2	72277680	72278597	1
NM_026560	chr4	124438927	124439070	1
NM_013812	chr5	124613439	124613939	1
NM_009870	chr10	126467022	126467730	1
NM_009873	chr5	3347670	3348106	1
NM_009874	chr13	101831246	101831657	1
NM_153785	chr11	51846923	51847591	1
NM_175833	chr9	103221915	103222587	1
NM_009881	chr13	35746433	35746828	1
NM_153788	chr11	69698317	69698603	1
NM_139153	chr5	23984253	23984371	1
NM_026665	chr9	13577009	13577288	1
NM_026832	chr14	45756165	45756441	1
NM_025395	chr2	128821766	128822136	1
NM_138585	chr8	75404388	75404647	1
NM_001025566	chr19	3846674	3846917	1
NM_023543	chr6	54202562	54202707	1
NM_025844	chr9	18042435	18042678	1
NM_133709	chr7	99882811	99883025	1
NM_009601	chr11	69609941	69610155	1
NM_145827	chr11	59352320	59352741	1
NM_027882	chr7	24990152	24990540	1
NM_016904	chr3	89503470	89503684	1
NM_025415	chr13	51657119	51657291	1
NM_011930	chr17	24900011	24900381	1
NM_017393	chr17	56678624	56679013	1
NM_146047	chr13	74067965	74068078	1
NM_001003908	chr11	86572359	86572562	1
NM_013493	chr6	87815386	87816126	1
NM_153585	chr9	114489182	114489832	1
NM_016877	chr6	35064115	35064727	1
NM_026949	chr11	57824486	57824968	1
NM_017477	chr6	87878452	87878778	1
NM_012003	chr6	124930132	124930481	1
NM_009940	chr7	118323520	118323689	1
NM_053071	chr15	35881621	35882009	1
NM_009187	chr17	83421742	83422070	1
NM_153166	chr17	28969932	28970264	1
NM_016856	chr12	102376222	102376396	1
NM_009950	chr10	94752667	94752770	1
NM_178661	chr6	37376204	37376481	1
NM_007764	chr16	17364864	17365083	1
NM_026952	chr11	98017936	98018256	1
NM_144933	chr9	15030800	15031051	1
NM_007777	chr1	64986146	64986331	1
NM_145473	chr15	81765735	81765958	1
NM_146087	chr18	61682329	61682540	1
NM_181417	chr2	144062773	144062994	1
NM_001037326	chr2	104391565	104392083	1
NM_007794	chr8	108508307	108508522	1
NM_026295	chr18	80630717	80630931	1
NM_022325	chr2	174082085	174082356	1
NM_133687	chr18	35984743	35984881	1
NM_026579	chr10	82789325	82789711	1
NM_178605	chr13	54599226	54599685	1
NM_145462	chr14	53507578	53508031	1
NM_145959	chr15	58446581	58446765	1
NM_025967	chr16	78458585	78458694	1
NM_198937	chr17	24687255	24687819	1
NM_033075	chr17	34607418	34608223	1
NM_177474	chr19	27495847	27496352	1
NM_146093	chr19	8939061	8939174	1
NM_033077	chr1	188667361	188667546	1
NM_026828	chr2	26173492	26173625	1
NM_177007	chr5	72818499	72818806	1
NM_001010825	chr5	113995980	113996176	1
NM_001033129	chr6	143178029	143178180	1
NM_138594	chr6	126905974	126906112	1
NM_178264	chr6	115642544	115642861	1
NM_181854	chr8	13870004	13870250	1
NM_172911	chr8	37563818	37564132	1
NM_001008231	chr17	49034496	49034642	1
NM_145507	chr1	130244160	130244299	1
NM_007829	chr17	33517184	33517508	1
NM_010022	chr3	116505311	116505425	1
NM_029974	chr3	89437818	89438131	1
NM_178896	chr5	73778054	73778369	1
NM_001042719	chr14	44579643	44579886	1
NM_199079	chr15	79372833	79373050	1
NM_007916	chr8	113886801	113887020	1
NM_017397	chr3	105814868	105815009	1
NM_019553	chr10	61996340	61997537	1
NM_197982	chr8	86605757	86605957	1
NM_028074	chr11	106032670	106032899	1
NM_138669	chr11	119115248	119115676	1
NM_007840	chr11	106604006	106604356	1
NM_026500	chr1	138160154	138160270	1
NM_016874	chr7	141178200	141178501	1
NM_207677	chr7	24929093	24929271	1
NM_001039122	chr2	152313775	152313920	1
NM_025900	chr13	47114577	47114755	1
NM_033324	chr16	18201657	18202199	1
NM_019505	chr11	88877747	88878182	1
NM_053272	chr4	106060385	106060633	1
NM_020046	chr8	112497044	112497438	1
NM_001039514	chr8	87962376	87962739	1
NM_026819	chr14	54693675	54693856	1
NM_183286	chr11	77848040	77848142	1
NM_145428	chr11	60647221	60647752	1
NM_001042620	chr5	52477254	52477546	1
NM_028136	chr3	62595303	62595569	1
NM_148948	chr12	105138869	105138978	1
NM_177852	chr2	180637781	180638016	1
NM_015802	chr8	38081908	38082081	1
NM_027591	chrX	99067286	99067463	1
NM_013811	chr17	30608028	30608166	1
NM_008298	chr4	40912579	40912831	1
NM_019794	chr8	88445618	88445921	1
NM_011847	chr5	30062196	30062311	1
NM_013760	chr12	45072803	45072993	1
NM_025384	chr14	76613730	76613972	1
NM_010066	chr9	20707514	20707657	1
NM_019448	chr10	77450144	77450258	1
NM_133763	chr2	164459333	164459615	1
NM_144491	chr11	75006076	75006665	1
NM_026344	chr4	117389020	117389277	1
NM_027193	chr3	115880286	115880615	1
NM_010075	chr5	27235629	27235806	1
NM_007834	chr16	94612633	94612851	1
NM_134448	chr1	34102192	34102305	1
NM_023173	chr1	172703691	172704234	1
NM_146229	chr9	114538318	114539064	1
NM_175332	chr11	97446166	97446670	1
NM_181316	chr9	22236014	22236234	1
NM_026932	chr4	118119149	118119257	1
NM_139293	chr16	20539216	20539516	1
NM_021876	chr7	89854385	89854538	1
NM_010106	chr9	78266096	78266487	1
NM_018796	chr1	63111763	63112237	1
NM_025380	chr13	38665404	38666222	1
NM_026007	chr19	9034405	9035456	1
NM_007907	chr10	80580256	80581092	1
NM_007911	chr11	69363564	69363748	1
NM_010119	chr19	6302747	6303072	1
NM_147151	chr17	34505958	34506322	1
NM_010120	chr18	46723110	46724002	1
NM_013557	chr5	144072955	144073136	1
NM_010121	chr6	70773070	70773207	1
NM_145371	chr5	124836159	124836344	1
NM_080635	chr15	51694855	51695107	1
NM_008388	chr15	43111964	43112514	1
NM_018749	chr15	77797450	77797637	1
NM_144958	chr11	69486589	69487250	1
NM_145625	chr15	101902482	101903387	1
NM_007918	chr8	28727761	28728668	1
NM_010124	chr10	60847092	60847380	1
NM_173363	chr12	111987101	111987289	1
NM_181582	chr11	69736322	69736641	1
NM_080287	chr2	164979507	164979650	1
NM_170777	chr9	21863774	21863957	1
NM_013536	chr6	124677301	124677446	1
NM_007930	chr13	98581813	98582305	1
NM_023119	chr4	149082511	149083367	1
NM_010139	chr4	140571811	140572053	1
NM_010144	chr5	137578698	137578921	1
NM_010147	chr7	4683713	4683924	1
NM_022313	chr11	77907904	77908201	1
NM_178085	chr6	119810853	119811035	1
NM_133658	chr18	32382775	32382952	1
NM_133660	chr8	96116910	96117051	1
NM_028039	chr14	64789609	64789786	1
NM_144866	chr18	35059036	35059841	1
NM_011809	chr16	95812024	95812274	1
NM_023794	chr16	22356245	22356559	1
NM_007968	chr11	4997587	4998053	1
NM_027148	chr3	54822206	54822494	1
NM_198605	chr14	56779900	56780076	1
NM_025648	chr8	87747416	87747556	1
NM_172422	chr1	63664916	63665509	1
NM_198176	chr2	130321013	130321117	1
NM_007990	chr19	6059535	6060004	1
NM_007991	chr7	27879580	27879728	1
NM_177076	chr5	21110463	21110787	1
NM_015822	chr14	101985041	101985144	1
NM_015798	chr18	85069817	85070482	1
NM_133765	chr8	124439697	124439812	1
NM_013890	chr2	34648345	34648565	1
NM_134469	chr3	89182138	89182398	1
NM_010193	chr9	62609198	62609340	1
NM_173423	chr18	46650427	46650650	1
NM_008001	chrX	146389748	146390004	1
NM_013710	chr17	29093613	29093798	1
NM_010206	chr8	26892315	26892425	1
NM_010207	chr7	130056403	130056546	1
NM_021891	chr11	11708513	11708763	1
NM_024169	chr15	98554539	98555448	1
NM_008020	chr19	7047757	7048099	1
NM_010223	chr8	73451619	73451791	1
NM_018828	chr2	90545891	90546213	1
NM_180974	chr17	88350361	88350539	1
NM_172291	chr9	34960085	34960262	1
NM_010236	chr2	32515467	32515793	1
NM_025310	chr11	106071720	106071891	1
NM_010178	chr4	135127277	135127744	1
NM_010242	chr9	14496510	14496657	1
NM_008053	chr3	34210007	34210145	1
NM_033648	chr6	117962606	117962824	1
NM_022004	chr9	45137867	45138176	1
NM_013716	chr11	55312005	55312627	1
NM_011816	chr5	93157630	93157959	1
NM_201638	chr3	123377536	123377842	1
NM_133837	chr2	5756567	5756999	1
NM_019468	chr5	63051842	63052016	1
NM_183358	chr8	87720327	87720510	1
NM_173739	chr7	111569666	111569768	1
NM_010256	chr16	91535185	91535836	1
NM_008087	chr7	51729115	51729401	1
NM_008108	chr6	122574936	122575345	1
NM_177367	chr11	76033071	76033876	1
NM_172558	chr11	57983879	57984171	1
NM_018771	chr8	86554507	86554664	1
NM_001004144	chr11	77308332	77309019	1
NM_029420	chr7	126486321	126486529	1
NM_010288	chr10	56066486	56066672	1
NM_133831	chr7	15103645	15103894	1
NM_001001650	chr3	86090166	86090308	1
NM_001033236	chr12	70396619	70396794	1
NM_198169	chr2	181216594	181216815	1
NM_022023	chr14	45743482	45743771	1
NM_008137	chr19	16557412	16557732	1
NM_010306	chr3	108274440	108274806	1
NM_019690	chr2	173938488	173939133	1
NM_008143	chr11	48643766	48644911	1
NM_010313	chr9	75098896	75099067	1
NM_178846	chr14	29846236	29847948	1
NM_198110	chrX	146358417	146358842	1
NM_018748	chr9	118354061	118354240	1
NM_001042484	chr8	24722750	24723043	1
NM_010324	chr19	43576942	43577520	1
NM_016739	chr2	103596600	103597366	1
NM_008160	chr9	108197895	108198079	1
NM_013535	chr6	124705034	124705187	1
NM_178602	chr9	71283481	71283808	1
NM_024478	chr5	36781338	36781696	1
NM_025768	chr8	13204670	13204991	1
NM_153419	chr7	45698429	45698869	1
NM_026231	chr3	133028537	133028719	1
NM_010362	chr19	47914789	47914899	1
NM_010361	chr10	75278893	75279275	1
NM_175335	chr12	91996106	91996787	1
NM_028812	chr16	37457893	37458109	1
NM_053266	chr5	134468214	134468487	1
NM_025652	chr5	147261586	147261774	1
NM_153116	chr5	5564348	5565410	1
NM_019581	chr17	45623981	45624240	1
NM_013882	chr15	85687571	85687758	1
NM_172711	chr5	69836386	69836701	1
NM_177688	chr6	136773038	136773260	1
NM_207000	chr10	61183114	61183313	1
NM_008210	chr1	182648947	182649227	1
NM_008212	chr3	131260624	131261014	1
NM_178878	chr5	30429854	30430264	1
NM_024284	chr17	24580178	24580352	1
NM_008216	chr15	56287253	56287423	1
NM_008231	chr3	87993204	87993341	1
NM_144835	chr13	12449888	12450261	1
NM_080446	chr10	119515375	119515592	1
NM_008234	chr19	38995097	38995419	1
NM_198298	chr11	107486037	107486482	1
NM_008235	chr16	29984534	29984712	1
NM_138753	chr11	102930721	102931204	1
NM_172746	chr7	126653880	126654250	1
NM_153173	chr13	23539538	23539709	1
NM_033596	chr3	96347234	96347975	1
NM_178218	chr11	58771003	58771399	1
NM_013820	chr6	82739532	82739883	1
NM_001025427	chr17	27280454	27280836	1
NM_008252	chr8	60402445	60402867	1
NM_178017	chr8	77888961	77889220	1
NM_027036	chr4	127768443	127768783	1
NM_013552	chr11	40576390	40577434	1
NM_001039129	chr15	103068371	103069344	1
NM_182650	chr6	51397844	51399366	1
NM_198090	chr2	75459208	75459460	1
NM_010448	chr11	51448343	51448772	1
NM_016884	chr14	51024971	51025576	1
NM_016690	chr5	100277599	100278690	1
NM_133834	chr6	117871544	117871908	1
NM_025279	chr13	58410548	58410798	1
NM_177301	chr7	28516833	28517215	1
NM_144922	chr7	25464562	25464919	1
NM_133255	chr8	87876437	87876728	1
NM_080634	chr3	20232789	20232998	1
NM_010480	chr12	111144584	111145379	1
NM_008300	chr11	53144726	53145314	1
NM_031165	chr9	40550568	40551000	1
NM_010481	chr18	35079459	35079991	1
NM_175111	chr16	35690250	35690798	1
NM_010477	chr1	55030944	55032153	1
NM_015755	chr16	90442671	90442778	1
NM_008317	chr9	107434261	107434505	1
NM_021395	chr9	44129918	44130164	1
NM_172015	chr13	49693892	49695034	1
NM_010493	chr9	20764789	20764941	1
NM_023892	chr9	20781622	20781799	1
NM_008325	chr5	108909539	108909645	1
NM_010499	chr8	87553468	87553753	1
NM_013562	chr12	40733964	40734143	1
NM_009951	chr11	95823797	95824750	1
NM_008342	chr1	72757079	72757413	1
NM_009212	chr19	3282573	3282720	1
NM_026079	chr4	56895737	56895907	1
NM_178257	chr4	134997854	134998101	1
NM_010560	chr13	113584113	113584345	1
NM_146100	chr19	47062970	47063204	1
NM_016692	chr19	9966095	9966377	1
NM_011919	chr8	11549761	11550110	1
NM_026574	chr2	119168133	119168243	1
NM_146152	chr4	117413384	117413694	1
NM_022986	chr9	82772766	82772890	1
NM_025526	chr5	114033045	114033620	1
NM_026531	chr7	78769757	78770571	1
NM_177663	chr3	88016594	88016854	1
NM_133927	chr6	128389659	128390175	1
NM_008400	chr7	127079494	127079599	1
NM_001039511	chr1	153107827	153108196	1
NM_146145	chr4	100763332	100763600	1
NM_152895	chr1	136372210	136372376	1
NM_001017426	chr11	69225186	69225442	1
NM_027261	chr9	15056083	15057227	1
NM_021566	chr2	163032554	163032694	1
NM_146165	chr5	144160131	144160549	1
NM_145958	chr6	56728305	56728510	1
NM_019715	chr6	72830025	72830552	1
NM_008420	chr2	166754607	166755384	1
NM_030716	chr19	45868444	45868621	1
NM_021542	chr14	18872752	18872859	1
NM_032397	chr8	73786123	73786263	1
NM_172747	chr7	126691794	126691906	1
NM_134073	chr14	66668050	66668343	1
NM_212445	chr9	53147594	53147702	1
NM_009004	chr18	34749854	34750054	1
NM_134471	chr4	116680067	116680250	1
NM_009769	chr14	98184344	98184738	1
NM_033563	chr1	64056799	64056976	1
NM_010638	chr19	23207530	23207755	1
NM_145605	chr8	124716823	124717003	1
NM_010639	chr7	44091355	44091501	1
NM_177261	chr7	139792892	139793133	1
NM_023294	chr17	71521857	71522840	1
NM_008465	chr16	35902244	35902597	1
NM_010655	chr11	106814541	106815126	1
NM_145568	chr6	71200676	71200826	1
NM_008470	chr11	100065720	100065900	1
NM_001033397	chr11	99152544	99152823	1
NM_212483	chr11	100090808	100090954	1
NM_130857	chr16	88766659	88766881	1
NM_008640	chr12	8947532	8947854	1
NM_026058	chr8	4491198	4491546	1
NM_172856	chr2	68633900	68634305	1
NM_010697	chr19	46093860	46094111	1
NM_010699	chr7	46713373	46713739	1
NM_010700	chr9	21472431	21472823	1
NM_177099	chr1	182736416	182736555	1
NM_025622	chr15	78682676	78682821	1
NM_011150	chr11	118219375	118219647	1
NM_013584	chr15	7077459	7077600	1
NM_176953	chr8	9978409	9978590	1
NM_001002011	chr3	88593040	88593688	1
NM_010722	chr10	80314555	80314739	1
NM_008084	chr6	125130525	125130841	1
NM_001008427	chr7	42720374	42720587	1
NM_001029930	chr14	4388149	4388585	1
NM_001033792	chr7	45650196	45650308	1
NM_001045541	chrX	99684191	99685042	1
NM_001039233	chr4	145372297	145372808	1
NM_001039239	chr13	62025411	62025686	1
NM_172950	chr12	16642018	16642211	1
NM_028838	chr9	110797985	110798163	1
NM_029044	chr11	60170503	60170728	1
NM_001024619	chr7	98236010	98236154	1
NM_030145	chr8	81716377	81716626	1
NM_175641	chr7	27041725	27041948	1
NM_025881	chr17	25981316	25981734	1
NM_011837	chr15	75391729	75391867	1
NM_011838	chr15	74569375	74569720	1
NM_029327	chr11	54704276	54704734	1
NM_025571	chr16	4539587	4539793	1
NM_001038663	chr16	16896689	16896794	1
NM_015806	chr9	75198948	75199081	1
NM_178907	chr9	107147162	107147302	1
NM_145569	chr6	72367780	72368373	1
NM_010771	chr18	35688734	35689097	1
NM_008558	chr12	77881792	77882167	1
NM_010772	chr7	126816032	126816425	1
NM_013595	chr10	79800079	79801259	1
NM_019709	chr8	122443122	122443612	1
NM_178266	chrX	152941896	152942230	1
NM_001009949	chr4	45553037	45553143	1
NM_178076	chr8	12914891	12915139	1
NM_008568	chr5	138399929	138401134	1
NM_027830	chr10	53382750	53383121	1
NM_010786	chr10	117058844	117058953	1
NM_008575	chr1	134852313	134852494	1
NM_010787	chr17	46145888	46146004	1
NM_025633	chr2	71254560	71254725	1
NM_026197	chr11	74587784	74587963	1
NM_001029990	chr14	50805955	50806598	1
NM_010792	chr10	126445471	126445754	1
NM_147126	chr9	43850878	43851093	1
NM_199472	chr1	182268521	182268652	1
NM_008598	chr7	136648547	136648686	1
NM_029657	chr16	4794119	4794468	1
NM_027422	chr10	78951074	78951337	1
NM_010798	chr10	75304229	75304405	1
NM_008600	chr10	127634567	127634714	1
NM_026472	chr1	120149576	120150186	1
NM_026810	chr9	111115578	111115865	1
NM_010804	chr2	17973653	17973760	1
NM_139311	chr11	97502291	97502605	1
NM_053015	chr1	92747339	92747484	1
NM_133823	chr8	82191371	82191514	1
NM_010816	chr16	48351096	48351443	1
NM_001039147	chr9	89911382	89911688	1
NM_019768	chrX	132086888	132087059	1
NM_011900	chr11	69478100	69478663	1
NM_026483	chr7	64270725	64270971	1
NM_008624	chr9	99249394	99249532	1
NM_018736	chr9	14534461	14534760	1
NM_026401	chr14	56780799	56781053	1
NM_025927	chr11	97130873	97131054	1
NM_029017	chr3	32928009	32928150	1
NM_198831	chr7	100457512	100457617	1
NM_178603	chr4	49541731	49542081	1
NM_026851	chr14	53382376	53382488	1
NM_025878	chr17	35523781	35524222	1
NM_173757	chr13	100445340	100445442	1
NM_145573	chr6	146999424	146999954	1
NM_029963	chr2	127281527	127281887	1
NM_010830	chr17	87883104	87883341	1
NM_144898	chr3	88997358	88997532	1
NM_010836	chr7	139902808	139902918	1
NM_173013	chr8	73835602	73836166	1
NM_026002	chr15	34026792	34027069	1
NM_028832	chr10	84558173	84558355	1
NM_013827	chr5	108301207	108301383	1
NM_172308	chr10	6366933	6367152	1
NM_133767	chr11	29425672	29425989	1
NM_016662	chr13	55338810	55338995	1
NM_016776	chr11	72259196	72259559	1
NM_008652	chr2	162747446	162747944	1
NM_008709	chr12	12964620	12964838	1
NM_010851	chr9	119188017	119188271	1
NM_010852	chr2	124813956	124814364	1
NM_178440	chr11	6427642	6428829	1
NM_026370	chr7	127704049	127704479	1
NM_013608	chr10	127439301	127439616	1
NM_028017	chr18	63097330	63097548	1
NM_027350	chr18	64641612	64641873	1
NM_016777	chr4	116124039	116124670	1
NM_153126	chr2	103561146	103561847	1
NM_025795	chr15	89184087	89184347	1
NM_010880	chr1	88189185	88189993	1
NM_023668	chr11	68669863	68669972	1
NM_013865	chr2	156682645	156682771	1
NM_010811	chr14	19517097	19517212	1
NM_024197	chr1	94303448	94303802	1
NM_026614	chr6	24477050	24477266	1
NM_023202	chr17	33431440	33431810	1
NM_026684	chr17	24450444	24450703	1
NM_153064	chr1	173075919	173076248	1
NM_010890	chr9	72461778	72461883	1
NM_028347	chr9	56947984	56948198	1
NM_010892	chr1	193520417	193520593	1
NM_080849	chr11	77993706	77993845	1
NM_015750	chr1	89415288	89415474	1
NM_133957	chr8	110181159	110181275	1
NM_023699	chr14	54807104	54807389	1
NM_010902	chr2	75505950	75506101	1
NM_183091	chr15	76458190	76458407	1
NM_020045	chr6	86976516	86976621	1
NM_023739	chr4	41160280	41160539	1
NM_178777	chr3	102137243	102137419	1
NM_011482	chr15	81873491	81873767	1
NM_022018	chr1	153331568	153331749	1
NM_026523	chr7	80774266	80774697	1
NM_008704	chr11	93783748	93784039	1
NM_001077529	chr11	93771099	93771245	1
NM_019731	chr17	25822090	25822477	1
NM_026393	chr16	4634033	4634359	1
NM_008707	chr11	102861233	102861376	1
NM_026277	chr8	110313726	110313932	1
NM_021315	chr19	38883744	38884254	1
NM_138747	chr6	125097818	125098180	1
NM_133702	chr11	107004450	107004952	1
NM_018868	chr1	59629560	59630068	1
NM_024193	chr2	129964529	129964938	1
NM_026578	chr3	129822295	129822645	1
NM_026631	chr11	51463207	51464207	1
NM_025403	chr2	112062835	112063127	1
NM_001039351	chr19	46110893	46111373	1
NM_172204	chr2	24914881	24915137	1
NM_027988	chr17	24425182	24425483	1
NM_023409	chr12	85664496	85664633	1
NM_008722	chr11	33061769	33062580	1
NM_010938	chr6	29997109	29997267	1
NM_022029	chr9	37303741	37303857	1
NM_001013372	chr12	88331317	88331718	1
NM_008740	chr11	103770597	103770757	1
NM_198326	chr2	151186037	151186541	1
NM_010942	chr5	38446572	38446715	1
NM_008744	chr11	68207304	68207614	1
NM_030699	chr3	110276995	110277178	1
NM_011956	chr17	24613606	24614080	1
NM_026623	chr8	96925502	96925628	1
NM_019837	chr17	27350144	27350252	1
NM_183392	chr5	93510595	93510960	1
NM_001002929	chr11	115380680	115381100	1
NM_172394	chr11	70783915	70784022	1
NM_026532	chr8	108750422	108750950	1
NM_019761	chr2	148369088	148369303	1
NM_033039	chr5	144308566	144308775	1
NM_013614	chr8	125453600	125453807	1
NM_139144	chrX	97843157	97843561	1
NM_146629	chr17	37351984	37352232	1
NM_146793	chr2	90070190	90070459	1
NM_001011528	chr6	42448146	42448296	1
NM_146822	chr7	103895416	103895527	1
NM_146358	chr7	104930566	104930745	1
NM_147034	chr7	106830029	106830488	1
NM_146562	chr9	19640056	19640163	1
NM_133752	chr16	29499603	29499790	1
NM_011014	chr4	41928972	41929295	1
NM_011959	chr5	22061584	22061688	1
NM_198105	chrX	146685664	146685896	1
NM_152818	chr11	3627807	3627906	1
NM_207530	chr18	13012381	13012523	1
NM_133676	chr14	49846042	49846192	1
NM_152812	chr4	14752874	14753094	1
NM_011025	chr2	130263775	130263990	1
NM_011032	chr11	120387627	120387812	1
NM_013625	chr11	74541338	74541650	1
NM_025939	chr5	78024964	78025754	1
NM_007415	chr1	182404368	182404589	1
NM_009632	chr14	49726628	49727160	1
NM_019574	chr11	3191468	3191614	1
NM_011865	chr6	86492990	86493607	1
NM_025835	chr9	100886441	100886557	1
NM_011043	chr3	45356966	45357071	1
NM_033595	chr18	37896655	37896833	1
NM_178708	chr8	13100848	13101148	1
NM_011045	chr2	131943814	131944058	1
NM_008787	chr10	75885375	75885730	1
NM_172832	chr18	61832013	61832631	1
NM_024229	chr11	120433187	120433546	1
NM_021396	chr19	29486613	29486859	1
NM_016688	chr9	65142821	65143273	1
NM_183408	chr9	20915155	20915314	1
NM_001029868	chrX	70075782	70076316	1
NM_029231	chr11	70225168	70225331	1
NM_008819	chr11	59846188	59846297	1
NM_011065	chr11	68914607	68914710	1
NM_175306	chr4	131625060	131625511	1
NM_007905	chr6	122306976	122307123	1
NM_174852	chr11	77798110	77798630	1
NM_172303	chr3	41654924	41655246	1
NM_026737	chr15	81698758	81698989	1
NM_001039536	chr11	62275188	62275634	1
NM_178698	chr4	133027905	133028522	1
NM_027388	chr11	84695573	84696015	1
NM_008841	chr8	73701054	73701378	1
NM_008842	chr17	29216829	29217046	1
NM_145478	chr15	88689113	88689539	1
NM_008844	chr10	80723410	80723672	1
NM_198191	chr2	32405526	32405895	1
NM_011099	chr9	59455367	59455979	1
NM_016915	chr15	79155235	79156048	1
NM_152813	chr11	102913838	102914081	1
NM_207279	chr5	110326139	110326706	1
NM_153804	chr12	77451218	77451331	1
NM_008877	chr17	12215991	12216133	1
NM_026385	chr8	97582888	97583101	1
NM_019755	chrX	6829162	6829404	1
NM_011636	chr9	92054270	92054411	1
NM_011125	chr2	164547463	164547614	1
NM_032398	chr8	74450425	74450579	1
NM_008882	chr1	196507111	196507218	1
NM_176973	chr6	88809313	88809502	1
NM_030262	chr10	76700972	76701333	1
NM_008892	chrX	89884166	89884536	1
NM_008893	chr19	5963278	5963421	1
NM_008894	chr11	5777777	5778166	1
NM_015810	chr11	106595011	106595512	1
NM_022811	chr4	45128042	45129086	1
NM_027002	chr18	31931743	31931849	1
NM_025901	chr2	181881919	181882703	1
NM_015784	chr3	54448951	54449059	1
NM_013633	chr17	35114521	35114825	1
NM_008902	chr15	97552942	97553241	1
NM_015817	chr10	78935838	78936008	1
NM_176831	chr9	57237948	57238234	1
NM_008907	chr11	6315373	6315517	1
NM_028677	chr5	44232464	44232648	1
NM_144954	chr16	17023148	17023425	1
NM_008910	chr12	73679239	73679449	1
NM_175934	chr17	35525021	35525638	1
NM_029948	chr4	143669982	143670273	1
NM_181650	chr10	85345787	85346126	1
NM_007453	chr1	163087105	163087419	1
NM_011157	chr10	61905163	61905338	1
NM_016781	chr15	98640653	98640789	1
NM_008923	chr5	139402188	139402393	1
NM_027230	chr2	165589654	165590087	1
NM_028444	chr7	105356712	105356883	1
NM_011159	chr16	15551663	15551910	1
NM_019830	chr7	44854901	44855406	1
NM_133740	chr7	49647476	49647732	1
NM_145404	chr8	109100431	109100906	1
NM_001039077	chr8	28508906	28509048	1
NM_027541	chr3	95941539	95941722	1
NM_027297	chr4	61895579	61895764	1
NM_021463	chrX	135803669	135803802	1
NM_022999	chr7	44921635	44921912	1
NM_008939	chr3	123501058	123501450	1
NM_029614	chr7	89392163	89392343	1
NM_133351	chr7	127723026	127723718	1
NM_177420	chr19	15991911	15992281	1
NM_011180	chr11	118064542	118064658	1
NM_008946	chr11	70342506	70342680	1
NM_021526	chr2	61513181	61513325	1
NM_010817	chr8	110476356	110476995	1
NM_011192	chr11	101131641	101132117	1
NM_001077363	chr10	79256915	79257240	1
NM_027275	chr6	71837529	71838149	1
NM_008959	chr13	67370076	67370225	1
NM_019766	chr10	127461018	127461311	1
NM_008972	chr1	88356643	88357052	1
NM_011200	chr1	30893156	30893360	1
NM_011201	chr2	167699158	167699623	1
NM_011213	chr4	117772907	117773014	1
NM_011214	chr4	131109668	131109972	1
NM_175004	chr11	86501095	86501295	1
NM_011221	chr11	6380238	6380444	1
NM_023292	chr9	35309355	35309713	1
NM_153390	chr17	28668507	28668793	1
NM_001033267	chr11	116306753	116307102	1
NM_029128	chr16	43808107	43809078	1
NM_175543	chr11	79489557	79489706	1
NM_029494	chr7	92615889	92616414	1
NM_029391	chr7	26876470	26876683	1
NM_023126	chr8	75089325	75089714	1
NM_011231	chr3	153848631	153850057	1
NM_011232	chr15	10431003	10431423	1
NM_053269	chr11	87220938	87221088	1
NM_011236	chr6	119868770	119869040	1
NM_011237	chr19	4201054	4201337	1
NM_144912	chr5	122613412	122613570	1
NM_009067	chr17	65768907	65769020	1
NM_009391	chr5	129335716	129336241	1
NM_011239	chr16	18160388	18161907	1
NM_023146	chr11	33340285	33340504	1
NM_027933	chr17	56395301	56395626	1
NM_198024	chr15	8877497	8877610	1
NM_016759	chr11	102208670	102208784	1
NM_001042727	chr15	102073340	102073679	1
NM_053268	chr9	96346729	96347085	1
NM_138956	chr10	120879904	120880156	1
NM_009029	chr14	72062835	72062943	1
NM_016809	chrX	7301885	7302427	1
NM_176838	chr8	109027133	109027248	1
NM_011252	chrX	53739023	53739307	1
NM_009033	chr8	81403337	81403743	1
NM_001042675	chr8	35394466	35394689	1
NM_133878	chr4	131616670	131617108	1
NM_173867	chr4	139972179	139972324	1
NM_025654	chr11	101438970	101439277	1
NM_178256	chrX	157987741	157987872	1
NM_011263	chr5	78343159	78343523	1
NM_011931	chr1	161068349	161068510	1
NM_001033536	chr9	72328290	72328464	1
NM_175389	chr3	138081317	138082264	1
NM_177740	chr7	73411959	73412581	1
NM_019492	chr4	62102220	62102353	1
NM_177370	chr11	4999586	4999864	1
NM_016802	chr9	108196361	108196719	1
NM_175092	chr5	123400358	123400743	1
NM_008164	chr15	75531886	75531996	1
NM_009068	chr13	34017017	34017230	1
NM_173184	chr8	86935214	86935339	1
NM_011275	chr12	29235999	29236295	1
NM_026799	chr15	12778386	12778668	1
NM_028810	chr2	50970132	50970496	1
NM_019706	chr18	21142881	21143095	1
NM_026440	chr18	68426160	68426510	1
NM_145417	chr1	137077800	137077949	1
NM_009070	chr17	24142669	24143098	1
NM_011284	chr4	132039255	132039917	1
NM_052835	chrX	70523768	70524486	1
NM_025919	chr4	135323882	135325227	1
NM_009076	chr2	32783936	32785180	1
NM_009438	chr7	44995001	44996512	1
NM_025974	chr9	120420781	120421354	1
NM_025586	chr14	17062734	17062994	1
NM_001002239	chr18	75126590	75127520	1
NM_009077	chr7	45586643	45586940	1
NM_029751	chr8	73825329	73826384	1
NM_009078	chr11	97843424	97843536	1
NM_019647	chr5	147143574	147144223	1
NM_009079	chr4	151168606	151169002	1
NM_022891	chr11	97596634	97598297	1
NM_207523	chr11	77997981	77999625	1
NM_024218	chr16	55891640	55892308	1
NM_009080	chr11	68718069	68718373	1
NM_011289	chr11	101258733	101259388	1
NM_011975	chr7	109310858	109312335	1
NM_009081	chr7	4396135	4396808	1
NM_009082	chr9	106287821	106288176	1
NM_013762	chr15	79908826	79910508	1
NM_009083	chr15	34386511	34388476	1
NM_053257	chr1	39312951	39313818	1
NM_172086	chr6	115773526	115773930	1
NM_025592	chr2	38825148	38826596	1
NM_021338	chr16	32976190	32977525	1
NM_018730	chr17	56298630	56299359	1
NM_019865	chrX	129932059	129932668	1
NM_025589	chr12	70101594	70102266	1
NM_026069	chr15	5063960	5064965	1
NM_009084	chr1	72644992	72646176	1
NM_001048058	chr11	114485080	114485672	1
NM_026055	chrX	33515342	33516395	1
NM_024212	chr9	63971547	63972295	1
NM_018860	chr10	127951372	127952061	1
NM_016980	chr5	108141334	108142119	1
NM_011290	chr5	121465585	121466004	1
NM_011291	chr1	16088709	16089543	1
NM_013721	chr2	26732937	26734233	1
NM_025433	chr17	46245445	46245693	1
NM_012053	chr15	76731400	76733584	1
NM_011292	chr5	65668152	65669849	1
NM_018853	chr9	61711427	61712239	1
NM_026020	chr7	141298391	141298599	1
NM_009085	chr17	45711297	45711509	1
NM_009086	chr2	128792873	128793118	1
NM_009088	chr6	71838426	71838540	1
NM_145938	chr13	35913075	35913391	1
NM_025963	chr17	27361817	27362392	1
NM_013725	chr7	44991342	44992247	1
NM_011295	chr10	23475099	23476558	1
NM_026533	chr7	116124476	116125018	1
NM_020600	chr18	60900185	60901490	1
NM_009091	chr10	79696714	79697030	1
NM_170669	chr7	117905327	117906450	1
NM_013647	chr7	28061067	28061462	1
NM_009092	chr7	81217737	81218211	1
NM_011296	chr17	33564419	33565778	1
NM_023133	chr7	24593701	24594197	1
NM_008503	chr17	24448313	24448554	1
NM_025587	chr2	180187707	180188082	1
NM_024175	chr13	91397550	91398525	1
NM_207635	chr14	23323661	23324342	1
NM_024266	chr9	44158808	44159495	1
NM_013765	chr10	128028122	128029513	1
NM_027015	chr3	90297652	90298568	1
NM_001033865	chr11	29447136	29447834	1
NM_026467	chr9	66745657	66746109	1
NM_016844	chr17	33429603	33430304	1
NM_009093	chr12	70076935	70077398	1
NM_012052	chr7	99355915	99357573	1
NM_016959	chr3	86227143	86228071	1
NM_009094	chrX	98390981	98391872	1
NM_009095	chr7	11822608	11823250	1
NM_009096	chr4	86327589	86328109	1
NM_011299	chr17	7020524	7020671	1
NM_011300	chr12	29219983	29221476	1
NM_009098	chr4	116651566	116653631	1
NM_029767	chr7	3307076	3308580	1
NM_011029	chr9	119976833	119977013	1
NM_028040	chr9	35017695	35018162	1
NM_021383	chr1	74440299	74440406	1
NM_009103	chr7	102316041	102316330	1
NM_199476	chr15	38023844	38024320	1
NM_001013769	chr13	67663956	67664063	1
NM_025546	chr16	11109661	11109812	1
NM_025517	chr3	116501960	116502091	1
NM_001003930	chr19	7549181	7549412	1
NM_130892	chr10	43590474	43590723	1
NM_001037709	chr4	43401752	43401864	1
NM_019743	chr6	100254276	100254672	1
NM_178280	chr18	81149995	81150165	1
NM_029456	chr19	3574563	3575029	1
NM_028349	chr3	116587442	116587655	1
NM_022028	chr12	70904969	70905358	1
NM_023248	chr5	130539540	130539788	1
NM_025848	chr9	50355244	50355420	1
NM_028777	chr11	116930536	116930808	1
NM_175255	chr11	51601237	51601450	1
NM_172596	chr14	19462150	19462297	1
NM_029279	chr13	51703864	51704123	1
NM_011350	chr6	82903846	82904094	1
NM_025814	chr6	67197395	67198383	1
NM_007618	chr12	104061990	104062151	1
NM_021372	chr11	20442004	20442290	1
NM_023871	chr2	29878885	29879030	1
NM_028385	chr6	113040531	113040678	1
NM_030241	chr5	124699673	124699965	1
NM_013651	chr10	80202226	80202379	1
NM_133953	chr8	113732411	113733385	1
NM_177386	chr2	10283542	10284019	1
NM_172592	chr13	104893971	104894368	1
NM_178923	chr16	90171791	90171942	1
NM_011358	chr11	116667414	116667935	1
NM_013663	chr17	28759032	28759669	1
NM_026499	chr2	162646990	162647172	1
NM_013731	chr2	162673829	162674010	1
NM_009163	chr10	60548682	60548826	1
NM_030750	chr12	76587964	76588326	1
NM_008507	chr5	122091935	122092148	1
NM_172966	chr18	42387854	42388025	1
NM_199022	chr2	125418488	125418593	1
NM_009171	chr11	60626376	60627067	1
NM_009172	chr8	89732580	89732795	1
NM_178848	chr13	43404887	43405066	1
NM_030710	chr1	173752988	173753206	1
NM_009193	chr5	33968010	33968114	1
NM_134251	chr16	33436334	33436626	1
NM_001038653	chr11	120765872	120766227	1
NM_146136	chr3	107462339	107462569	1
NM_054087	chr1	166086412	166086880	1
NM_011394	chr8	23942865	23943186	1
NM_024211	chr11	70462370	70462654	1
NM_026255	chr6	94465983	94466204	1
NM_138756	chr9	96921657	96921871	1
NM_026542	chr11	102224078	102224465	1
NM_001007570	chr8	73139293	73139442	1
NM_146076	chr17	28377764	28378032	1
NM_022317	chr13	58624269	58624480	1
NM_022880	chr17	45058580	45058840	1
NM_011401	chr6	122709198	122709478	1
NM_022885	chr13	102051955	102052135	1
NM_144798	chr17	74300912	74301277	1
NM_009508	chr2	158304331	158304693	1
NM_026404	chr18	36805661	36805950	1
NM_177732	chr4	102713788	102713947	1
NM_175121	chr15	96525887	96526070	1
NM_026721	chr2	90869516	90869624	1
NM_001077709	chr17	33639533	33639702	1
NM_008577	chr19	8780032	8780706	1
NM_173774	chr4	149493580	149493775	1
NM_146198	chr7	123003186	123003362	1
NM_009320	chr6	91665849	91665993	1
NM_007513	chr5	148708919	148709442	1
NM_001007567	chr8	109099373	109099694	1
NM_148929	chr2	167113452	167113947	1
NM_198864	chr3	73048230	73048389	1
NM_025540	chr9	53642527	53642835	1
NM_053124	chr8	83635932	83636193	1
NM_007958	chr6	64972700	64973654	1
NM_009211	chr9	109976412	109976590	1
NM_080470	chr15	84944623	84944770	1
NM_172429	chr19	53444418	53444726	1
NM_133888	chr4	132006390	132006752	1
NM_001038627	chr5	145219864	145220037	1
NM_144918	chr6	85398175	85398275	1
NM_015782	chr7	26905181	26905661	1
NM_026506	chr6	86338548	86339020	1
NM_025507	chr12	88361000	88361245	1
NM_028965	chr11	96594084	96594183	1
NM_029394	chr18	53370765	53370866	1
NM_024225	chr2	143961067	143961456	1
NM_019654	chr17	86980658	86980937	1
NM_011434	chr16	90033535	90033674	1
NM_009231	chr17	80391581	80391861	1
NM_011443	chr3	34840768	34841012	1
NM_016907	chr2	119564940	119565329	1
NM_009260	chr11	30097637	30097822	1
NM_026040	chr18	52591550	52591809	1
NM_153070	chr6	112683633	112683951	1
NM_009272	chr4	147434811	147434915	1
NM_009275	chr9	103059352	103059501	1
NM_016799	chr4	134625922	134626314	1
NM_175229	chr17	23547911	23548092	1
NM_028358	chr6	40401419	40401795	1
NM_133772	chr8	73536405	73537009	1
NM_133726	chr15	81226023	81226392	1
NM_009180	chr11	116487759	116489154	1
NM_011374	chr6	142923713	142924052	1
NM_016964	chr5	138510484	138510788	1
NM_146258	chr5	151636157	151636909	1
NM_213659	chr11	100756193	100756391	1
NM_016737	chr19	7092079	7092293	1
NM_025285	chr3	8494916	8495091	1
NM_016665	chr11	120528713	120528851	1
NM_008408	chr9	36516954	36517132	1
NM_024222	chr9	115157802	115158079	1
NM_021433	chr1	156997077	156997388	1
NM_172891	chr6	131282365	131282472	1
NM_026474	chr14	78320768	78321044	1
NM_133354	chr11	115352747	115352888	1
NM_181423	chr10	61846277	61847140	1
NM_013677	chr2	26737689	26737798	1
NM_199196	chr11	79808242	79808695	1
NM_026716	chr7	28248517	28248778	1
NM_019666	chr9	88319358	88320630	1
NM_018800	chr3	103775980	103776202	1
NM_025579	chr4	131545921	131546244	1
NM_021441	chr8	122490730	122491068	1
NM_033074	chr15	11343889	11344326	1
NM_027931	chr3	95840059	95840443	1
NM_175225	chr2	139757383	139757492	1
NM_144522	chr7	126990304	126990482	1
NM_178385	chr17	46357803	46357978	1
NM_029878	chr11	121335786	121336147	1
NM_019786	chr10	120993896	120994078	1
NM_020601	chrX	73762066	73762380	1
NM_145396	chr17	24434699	24434810	1
NM_025289	chr9	37406412	37406585	1
NM_134011	chr11	6524934	6526749	1
NM_032005	chr1	167001633	167001797	1
NM_031182	chr16	4473241	4473922	1
NM_011548	chr10	79841637	79841922	1
NM_013686	chr17	12759813	12760065	1
NM_028354	chr12	100285995	100286216	1
NM_153484	chr15	81637798	81638050	1
NM_019643	chr6	148903121	148903342	1
NM_009353	chr8	109984898	109985092	1
NM_009361	chr8	13338091	13338571	1
NM_009372	chr17	70754509	70754923	1
NM_173396	chr2	156532907	156533052	1
NM_011568	chr11	120410340	120410564	1
NM_146153	chr4	125703912	125704241	1
NM_008188	chr6	113012417	113012779	1
NM_009382	chr9	43791023	43791290	1
NM_009383	chr7	128253173	128253671	1
NM_011590	chr1	137130946	137131171	1
NM_025616	chr7	28020168	28020387	1
NM_013898	chrX	129887590	129887771	1
NM_011594	chr11	118105464	118105797	1
NM_025372	chr9	64085925	64086033	1
NM_009387	chr11	117636472	117636735	1
NM_026708	chr11	77995169	77995455	1
NM_145375	chr7	81731628	81731739	1
NM_026281	chr6	146590665	146591033	1
NM_010744	chr9	21259952	21260322	1
NM_026775	chr12	86263909	86264173	1
NM_019770	chr5	124802455	124802646	1
NM_173453	chr11	60695583	60695933	1
NM_019704	chr9	107396559	107396818	1
NM_133804	chr19	10934287	10934487	1
NM_144792	chr19	32276425	32276530	1
NM_019953	chr10	127724860	127725134	1
NM_028766	chr6	91442207	91442604	1
NM_025452	chr4	128606554	128606882	1
NM_025382	chr4	134126673	134126981	1
NM_177601	chr5	20394680	20394790	1
NM_177670	chr4	116053342	116053954	1
NM_024246	chr3	88420901	88421197	1
NM_021793	chr17	25840385	25840606	1
NM_027797	chr7	141179991	141180134	1
NM_026519	chr2	112167729	112167986	1
NM_026436	chr7	46915942	46916048	1
NM_133706	chr11	78366036	78366681	1
NM_177073	chr7	100738130	100738274	1
NM_023680	chr7	143446325	143446557	1
NM_009401	chr4	144677174	144677456	1
NM_011613	chr14	77458211	77458475	1
NM_134138	chr18	67767529	67767694	1
NM_145390	chr8	87926092	87926540	1
NM_024214	chr8	129832221	129832699	1
NM_009415	chr6	124779179	124779474	1
NM_009429	chr14	74578690	74578970	1
NM_016715	chr5	109991698	109991929	1
NM_134000	chr10	39328839	39329128	1
NM_153792	chr17	24255819	24256970	1
NM_144549	chr15	59476714	59477302	1
NM_144554	chr2	152029867	152030047	1
NM_011588	chr7	11925400	11925577	1
NM_197987	chr11	86942369	86942473	1
NM_025863	chr3	69133669	69133895	1
NM_001042503	chr9	114363785	114364072	1
NM_198020	chr8	87579347	87579782	1
NM_027296	chr6	106735574	106735894	1
NM_011640	chr11	69396749	69397121	1
NM_021897	chr4	11082623	11083024	1
NM_011642	chr4	152940748	152941140	1
NM_027925	chr4	131580976	131581254	1
NM_001077364	chrX	135946214	135946401	1
NM_199033	chr6	115510922	115511222	1
NM_011650	chr1	120136904	120137190	1
NM_053082	chr7	141325729	141325917	1
NM_019634	chrX	9642160	9642406	1
NM_177325	chr11	74714334	74714907	1
NM_175146	chrX	146436717	146437077	1
NM_024477	chr5	111526140	111526566	1
NM_028209	chr4	106176473	106176661	1
NM_177625	chr14	49715538	49715829	1
NM_027412	chr19	8885768	8886163	1
NM_011654	chr15	98762908	98763435	1
NM_009448	chr15	98860344	98860605	1
NM_011655	chr17	35449837	35450464	1
NM_197993	chr19	9021035	9021763	1
NM_001005506	chr4	129142711	129142867	1
NM_025868	chr2	84471666	84472213	1
NM_001009935	chr3	96639252	96639481	1
NM_016792	chr18	63817995	63818095	1
NM_001042408	chr18	80369271	80369649	1
NM_001042523	chr10	82240146	82240276	1
NM_018793	chr9	20881901	20882100	1
NM_021288	chr5	30403074	30403295	1
NM_019883	chr8	73437504	73439206	1
NM_026872	chr4	41462908	41463087	1
NM_019639	chr5	125684101	125684223	1
NM_009457	chrX	19820177	19820503	1
NM_145578	chr7	11936659	11937018	1
NM_023585	chr16	15507420	15507609	1
NM_173010	chr7	59095952	59096277	1
NM_011908	chr5	148860329	148860511	1
NM_016682	chr7	33876182	33876408	1
NM_018798	chrX	148838526	148838891	1
NM_178648	chr8	35108233	35108521	1
NM_019562	chr1	145540069	145540207	1
NM_026765	chr2	181512225	181512596	1
NM_011671	chr7	100367897	100368472	1
NM_198899	chr1	36188021	36188346	1
NM_009471	chr16	33886151	33886406	1
NM_024451	chr5	139503705	139503973	1
NM_030680	chr8	73283103	73283281	1
NM_025650	chr10	79809538	79809708	1
NM_009462	chr8	122797626	122798037	1
NM_001038589	chr18	10029264	10029632	1
NM_177561	chr5	74375040	74376270	1
NM_133992	chr10	127706141	127706512	1
NM_026031	chr4	124217999	124218215	1
NM_178635	chr7	99020583	99020724	1
NM_146216	chr8	113506064	113506311	1
NM_009503	chr4	43020305	43020638	1
NM_011694	chr11	52203606	52204189	1
NM_178070	chr7	80143898	80144090	1
NM_021312	chr1	60042085	60042195	1
NM_173741	chr17	25546922	25547026	1
NM_175552	chr3	100290532	100291187	1
NM_001008498	chr2	29871482	29872075	1
NM_021322	chr17	31241061	31241376	1
NM_153555	chr1	173984363	173984483	1
NM_023191	chr9	54537105	54537425	1
NM_028599	chr1	45739392	45739503	1
NM_027432	chr3	106087860	106088647	1
NM_009516	chr7	109914534	109914857	1
NM_001012723	chr2	164330140	164330378	1
NM_011716	chr5	37279473	37279575	1
NM_011915	chr10	120383272	120383655	1
NM_178398	chr5	142881340	142881491	1
NM_029361	chr13	48966765	48966913	1
NM_133756	chr5	31771747	31772294	1
NM_013842	chr11	5417706	5417849	1
NM_020506	chr14	56618091	56618692	1
NM_028816	chr7	125876220	125876367	1
NM_134151	chr4	128692767	128693119	1
NM_011732	chr4	118791412	118791704	1
NM_029887	chr7	28947287	28947573	1
NM_019661	chr11	5857280	5857538	1
NM_027166	chr17	72744192	72744561	1
NM_181412	chr15	88578617	88578759	1
NM_173424	chr1	162871954	162873745	1
NM_175537	chr9	96538842	96539031	1
NM_173399	chr4	45031233	45031450	1
NM_146253	chr2	37252491	37252632	1
NM_009565	chr3	89466870	89467004	1
NM_025970	chr4	128838491	128838679	1
NM_020594	chr2	128659816	128660074	1
NM_172735	chr6	30340653	30340838	1
NM_026479	chr11	53168262	53168556	1
NM_080855	chr8	124493142	124493473	1
NM_177027	chr4	44776981	44777334	1
NM_027494	chr5	123980718	123981012	1
NM_026917	chr9	122962142	122962359	1
NM_133349	chr5	139736329	139736603	1
NM_022985	chr7	84565650	84565769	1
NM_198644	chr15	68091712	68091820	1
NM_009281	chr7	109851645	109852318	1
NM_011980	chr7	29877782	29878388	1
NM_001033425	chr17	23328525	23328888	1
NM_011751	chr11	80199598	80200137	1
NM_175247	chr7	5987640	5987845	1
NM_138949	chr11	62610227	62610490	1
NM_175428	chr16	98117316	98117424	1
NM_177758	chr4	128088928	128089070	1
NM_030743	chr2	167195226	167195344	1
NM_011756	chr7	28090351	28090536	1
NM_175494	chr13	64161156	64161264	1
NM_007564	chr12	81031195	81031309	1
NM_001001806	chr17	84094500	84094682	1
NM_028316	chr7	5776996	5777287	1
NM_030139	chrX	52721313	52721501	1
NM_177811	chr13	67919939	67920261	1
NM_172941	chr11	59323626	59323767	1
NM_172617	chr17	27931753	27931900	1
NM_207255	chr18	65705183	65705870	1
NM_146201	chr7	127022558	127022704	1
NM_152814	chr7	29798536	29799144	1
NM_024215	chr4	133522542	133522884	1
NM_030199	chr15	75767794	75767932	1
NM_144519	chr3	32703196	32703477	1
NM_028298	chr5	145484906	145485027	1
NM_133218	chr3	9593693	9594264	1
NM_026521	chr15	36952577	36952896	1
NM_027264	chr7	43180881	43180988	1
NM_016683	chr5	145460926	145461275	1
NM_024231	chr19	6074739	6075220	1
NM_183154	chr12	84521467	84521799	1
NM_030081	chr6	92153280	92153538	1
NM_022987	chr14	121598356	121598545	1
NM_009517	chr3	32555266	32556627	1
NM_026670	chr4	126562903	126563155	1
NM_026507	chr9	63970445	63970745	1
NM_001005859	chr3	130717244	130717596	0
NM_026399	chr8	87966291	87966545	0
NM_025463	chr19	8956243	8956458	0
NM_026940	chr16	17062466	17062586	0
NM_025465	chr8	69414208	69414590	0
NM_028077	chr19	3706611	3707202	0
NM_028244	chr17	31766025	31766769	0
NM_025952	chrX	102213856	102214222	0
NM_021529	chr12	56220420	56220681	0
NM_001004146	chr11	3052761	3053047	0
NM_145412	chr8	109780891	109781136	0
NM_145412	chr8	109781395	109782183	0
NM_172453	chr9	65384877	65385025	0
NM_031185	chr10	6000580	6000816	0
NM_008525	chr4	62005720	62006079	0
NM_008525	chr4	62000667	62000809	0
NM_133872	chr4	135873681	135873790	0
NM_133796	chr11	120396909	120397313	0
NM_001034858	chr10	41710510	41710651	0
NM_019652	chr8	87914204	87914529	0
NM_172421	chr12	3425287	3425405	0
NM_146065	chr15	102453833	102453972	0
NM_001024917	chr5	65975559	65975696	0
NM_016888	chr11	22760872	22761017	0
NM_016812	chr8	124835906	124836053	0
NM_172758	chr8	98711377	98711604	0
NM_172758	chr8	98742406	98742689	0
NM_010238	chr17	33731962	33732183	0
NM_010238	chr17	33733651	33734089	0
NM_027453	chr4	108329674	108329787	0
NM_027453	chr4	108330761	108330966	0
NM_001042556	chr10	39935941	39936078	0
NM_011274	chr7	37728998	37729320	0
NM_011274	chr7	37729844	37729961	0
NM_007597	chr11	50169602	50169867	0
NM_013742	chr7	143402356	143402625	0
NM_009837	chr11	22890956	22891925	0
NM_009853	chr11	69479833	69479985	0
NM_175833	chr9	103224494	103224653	0
NM_025415	chr13	51663511	51663726	0
NM_009187	chr17	83421050	83421273	0
NM_009950	chr10	94753502	94753662	0
NM_181322	chr8	108575098	108575308	0
NM_026828	chr2	26177626	26177842	0
NM_181854	chr8	13868899	13869292	0
NM_007840	chr11	106596394	106596659	0
NM_025900	chr13	47115797	47115978	0
NM_001039514	chr8	87961232	87961918	0
NM_011805	chr2	180630792	180630979	0
NM_010066	chr9	20703963	20704450	0
NM_025380	chr13	38664347	38664448	0
NM_026007	chr19	9033536	9033895	0
NM_010119	chr19	6271382	6271491	0
NM_010119	chr19	6275815	6275959	0
NM_145830	chr17	34518558	34518917	0
NM_007918	chr8	28726910	28727378	0
NM_007930	chr13	98595948	98596127	0
NM_007930	chr13	98585721	98586042	0
NM_007930	chr13	98583696	98584373	0
NM_023119	chr4	149081714	149081861	0
NM_010147	chr7	4685597	4685816	0
NM_144866	chr18	35055915	35056054	0
NM_144866	chr18	35056400	35056718	0
NM_007990	chr19	6058220	6058384	0
NM_007991	chr7	27886745	27886886	0
NM_177076	chr5	21050792	21050976	0
NM_134469	chr3	89188363	89188601	0
NM_021891	chr11	11709989	11710204	0
NM_018828	chr2	90545161	90545450	0
NM_018828	chr2	90547152	90547562	0
NM_025310	chr11	106071404	106071559	0
NM_008108	chr6	122574229	122574374	0
NM_001004144	chr11	77311669	77312061	0
NM_008143	chr11	48645259	48645601	0
NM_008143	chr11	48642686	48643199	0
NM_016739	chr2	103650113	103650363	0
NM_025768	chr8	13189748	13189999	0
NM_053266	chr5	134467561	134467668	0
NM_178878	chr5	30428630	30429393	0
NM_008235	chr16	29982179	29982360	0
NM_172746	chr7	126659025	126659129	0
NM_172746	chr7	126676398	126676717	0
NM_182650	chr6	51395398	51395517	0
NM_146130	chr2	75460824	75461153	0
NM_133834	chr6	117873557	117873765	0
NM_133834	chr6	117882284	117882579	0
NM_177301	chr7	28520573	28520702	0
NM_178089	chr7	25461861	25461970	0
NM_010480	chr12	111146130	111146673	0
NM_175111	chr16	35689477	35689895	0
NM_010477	chr1	55029320	55029542	0
NM_010477	chr1	55030175	55030504	0
NM_172015	chr13	49695728	49696114	0
NM_010499	chr8	87555647	87555831	0
NM_009951	chr11	95819760	95820009	0
NM_016692	chr19	9964952	9965098	0
NM_016692	chr19	9966858	9967071	0
NM_026531	chr7	78771886	78772027	0
NM_027261	chr9	15058921	15059180	0
NM_027261	chr9	15057590	15057997	0
NM_001002011	chr3	88579700	88580039	0
NM_001039233	chr4	145398297	145398468	0
NM_001039233	chr4	145397664	145397773	0
NM_001038663	chr16	16892383	16892583	0
NM_010771	chr18	35682666	35682914	0
NM_010771	chr18	35687181	35687470	0
NM_010772	chr7	126815229	126815521	0
NM_013595	chr10	79803144	79803293	0
NM_178076	chr8	13020162	13020414	0
NM_027830	chr10	53439848	53440133	0
NM_010816	chr16	48352149	48352249	0
NM_011900	chr11	69473779	69473994	0
NM_025927	chr11	97125956	97126308	0
NM_016776	chr11	72257977	72258832	0
NM_178440	chr11	6419214	6419320	0
NM_178440	chr11	6429115	6429598	0
NM_178440	chr11	6424023	6424302	0
NM_178440	chr11	6426088	6426593	0
NM_010880	chr1	88192082	88192292	0
NM_010880	chr1	88190964	88191363	0
NM_008705	chr11	93772541	93772697	0
NM_026393	chr16	4639511	4639730	0
NM_008707	chr11	102858303	102858526	0
NM_024193	chr2	129965486	129965698	0
NM_026578	chr3	129821692	129821939	0
NM_026631	chr11	51458030	51458340	0
NM_001039351	chr19	46129493	46130059	0
NM_023409	chr12	85662146	85662448	0
NM_008722	chr11	33060924	33061060	0
NM_001013372	chr12	88332349	88332701	0
NM_019837	chr17	27348853	27349068	0
NM_009632	chr14	49724535	49724963	0
NM_011865	chr6	86489333	86489531	0
NM_172303	chr3	41661126	41661333	0
NM_172303	chr3	41652763	41653205	0
NM_008842	chr17	29219835	29220017	0
NM_016915	chr15	79154409	79154729	0
NM_207279	chr5	110333888	110334382	0
NM_181650	chr10	85347224	85347638	0
NM_027230	chr2	165574103	165574350	0
NM_019830	chr7	44854084	44854197	0
NM_001039077	chr8	28509530	28509897	0
NM_027541	chr3	95903310	95903449	0
NM_027541	chr3	95904484	95904832	0
NM_022999	chr7	44919740	44919888	0
NM_011192	chr11	101131067	101131284	0
NM_008972	chr1	88355556	88355738	0
NM_008972	chr1	88303608	88303755	0
NM_008972	chr1	88353191	88353413	0
NM_011200	chr1	30819036	30819254	0
NM_023292	chr9	35319166	35319495	0
NM_009067	chr17	65771878	65772120	0
NM_009391	chr5	129333926	129334115	0
NM_001042727	chr15	102072124	102072404	0
NM_009033	chr8	81404202	81404498	0
NM_011263	chr5	78338985	78339410	0
NM_019706	chr18	21143530	21143805	0
NM_052835	chrX	70522156	70522267	0
NM_009076	chr2	32788315	32788791	0
NM_009438	chr7	44997024	44997657	0
NM_009079	chr4	151170321	151170910	0
NM_022891	chr11	97595091	97595298	0
NM_022891	chr11	97598947	97599161	0
NM_009080	chr11	68718949	68719138	0
NM_011289	chr11	101260640	101260746	0
NM_011975	chr7	109304015	109304204	0
NM_011975	chr7	109309817	109309956	0
NM_009082	chr9	106288751	106289149	0
NM_013762	chr15	79910906	79911157	0
NM_172086	chr6	115771891	115772363	0
NM_021338	chr16	32978245	32978415	0
NM_026069	chr15	5063175	5063437	0
NM_026020	chr7	141298970	141299945	0
NM_011295	chr10	23477020	23477337	0
NM_013647	chr7	28059977	28060163	0
NM_009092	chr7	81216370	81216592	0
NM_011296	chr17	33563408	33563664	0
NM_023133	chr7	24594730	24594869	0
NM_023133	chr7	24592879	24593249	0
NM_023133	chr7	24591119	24591602	0
NM_207635	chr14	23322935	23323046	0
NM_013765	chr10	128027015	128027188	0
NM_001033865	chr11	29448327	29448691	0
NM_009093	chr12	70075896	70076172	0
NM_009094	chrX	98389412	98390038	0
NM_011029	chr9	119977358	119978810	0
NM_025546	chr16	11116360	11116608	0
NM_029279	chr13	51665010	51665225	0
NM_025814	chr6	67195465	67195773	0
NM_013663	chr17	28762084	28762237	0
NM_026542	chr11	102222993	102223093	0
NM_009211	chr9	109977949	109978194	0
NM_133888	chr4	132010335	132010545	0
NM_001046637	chr7	26903632	26904162	0
NM_024225	chr2	143958936	143959221	0
NM_019666	chr9	88282218	88282467	0
NM_019643	chr6	148902519	148902636	0
NM_019643	chr6	148901001	148901149	0
NM_009353	chr8	109959757	109959911	0
NM_009372	chr17	70757266	70757426	0
NM_026708	chr11	77996675	77996952	0
NM_019953	chr10	127725784	127726398	0
NM_026519	chr2	112169062	112169407	0
NM_133706	chr11	78367297	78367408	0
NM_145390	chr8	87924437	87924641	0
NM_024214	chr8	129831210	129831627	0
NM_024214	chr8	129830250	129830676	0
NM_001042503	chr9	114359474	114359589	0
NM_028209	chr4	106203085	106203337	0
NM_177625	chr14	49717193	49717448	0
NM_027412	chr19	8890677	8890778	0
NM_011655	chr17	35443721	35444078	0
NM_001042523	chr10	82237222	82237365	0
NM_019639	chr5	125682557	125682780	0
NM_019639	chr5	125683444	125683632	0
NM_025650	chr10	79808610	79808893	0
NM_001008498	chr2	29869617	29870622	0
NM_021322	chr17	31240289	31240530	0
NM_001033425	chr17	23330438	23330619	0
NM_028316	chr7	5776005	5776371	0
NM_146201	chr7	127027067	127027177	0
